# Supplementary material
Source: publisher figshare collection journal article supplement (https://gsajournals.figshare.com/articles/dataset/_/10689380)

- a) Density of two uncorrelated bivariate Laplace random variables with null means and unit scales.  $e_1$  and  $e_2$  are coordinates of bivariate vectors.

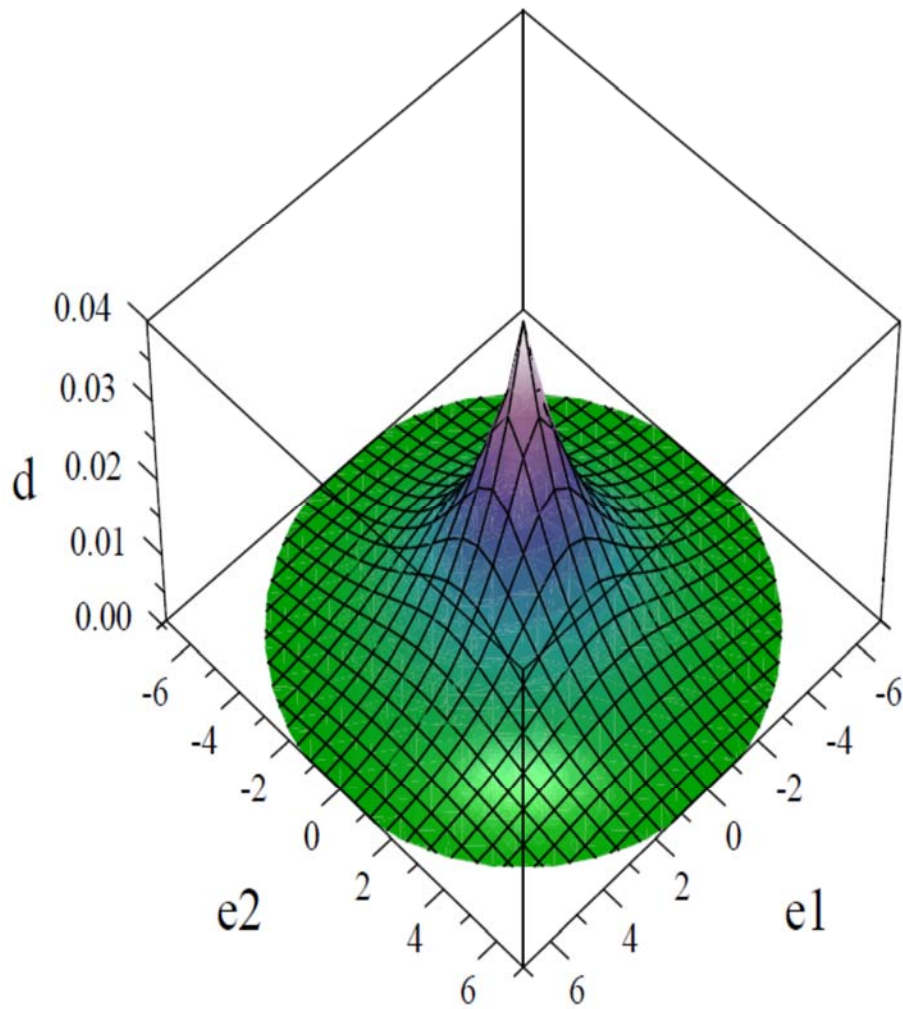

- b) Density of two positively correlated bivariate Laplace random variables with null means and unit scales.  $e_1$  and  $e_2$  are coordinates of bivariate vectors

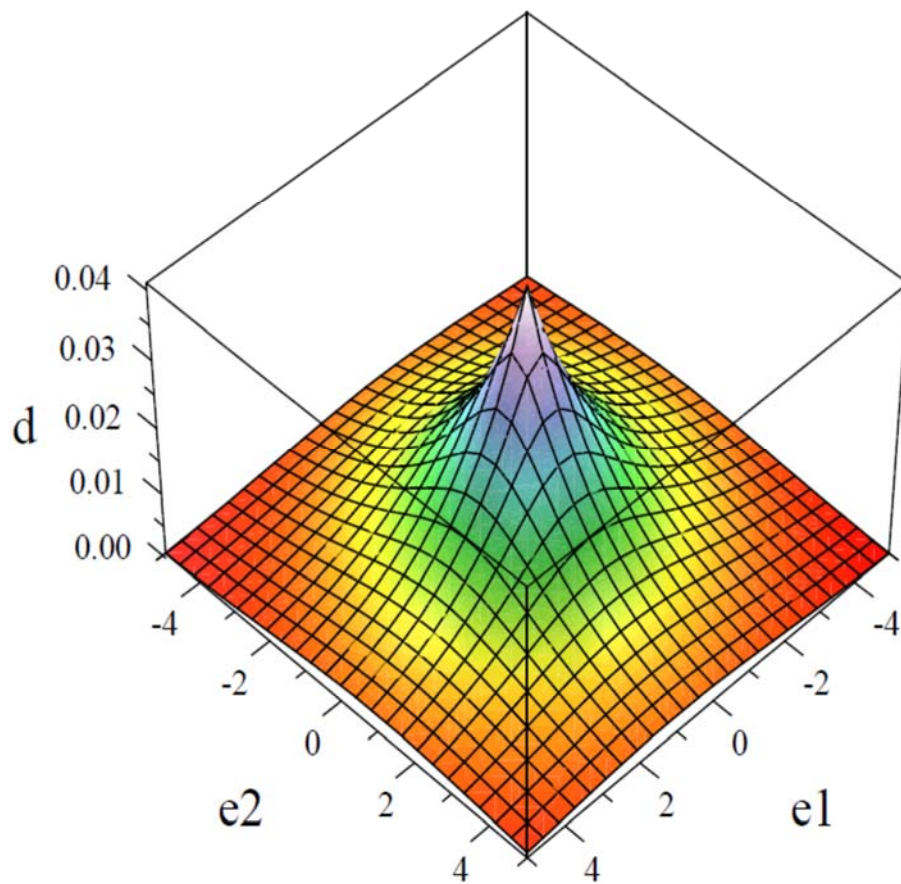

- c) Density of two negatively correlated bivariate Laplace random variables with null means and unit scales.  $e_1$  and  $e_2$  are coordinates of bivariate vectors

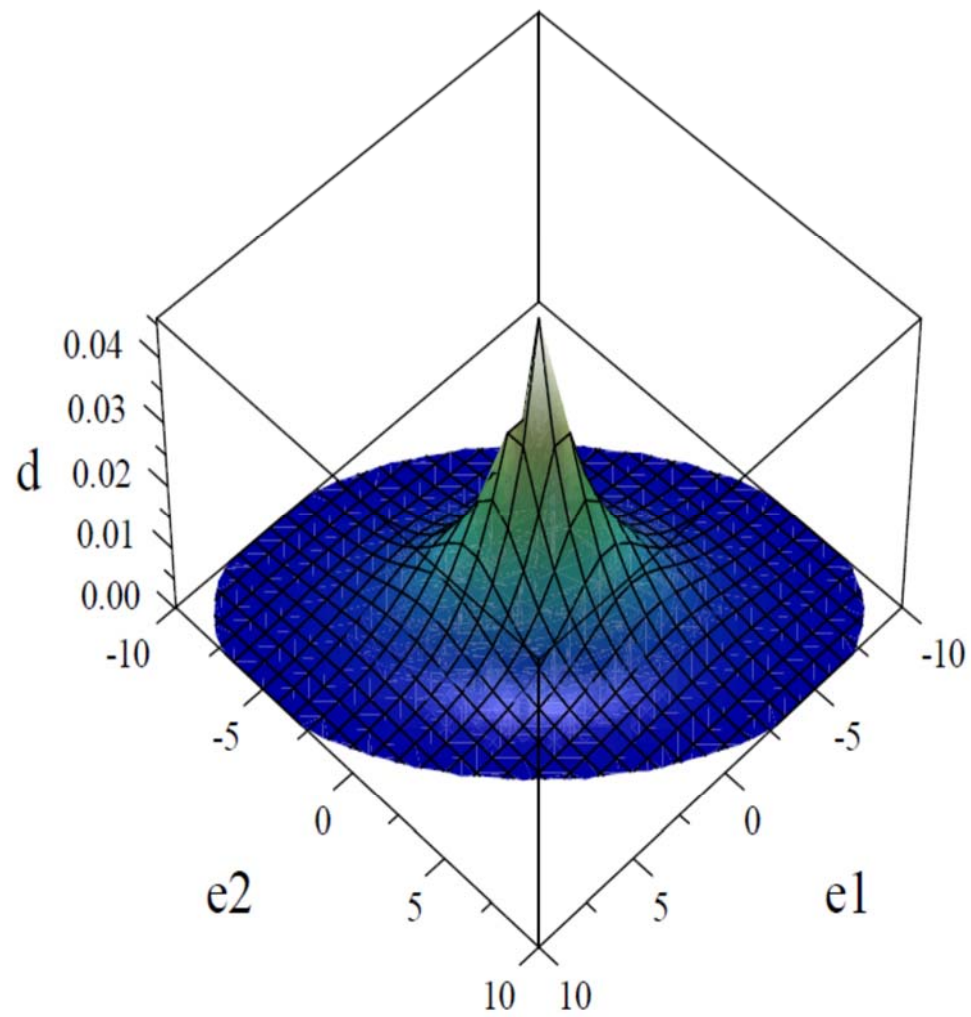

- d) Bivariate Laplace density with means (scales) -4 (1) and 4 (4); correlation= 0. C1 and C2 are coordinates of bivariate vectors.

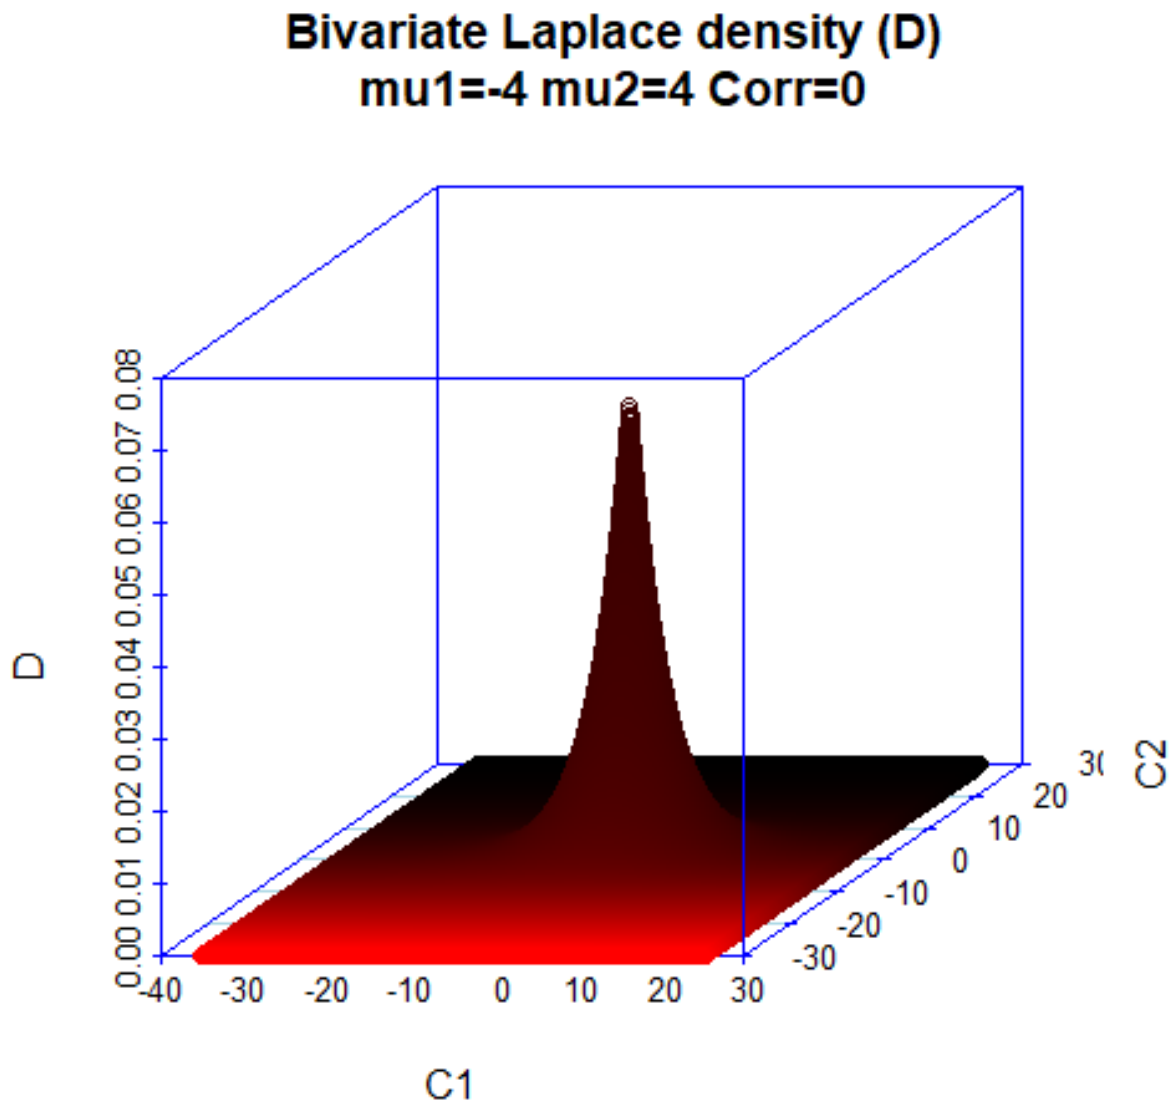

- e) Bivariate Laplace density with means (scales) -4 (1) and 4 (4); correlation=- 0.75. C1 and C2 are coordinates of bivariate vectors.

**Bivariate Laplace density (D)**  
 **$\mu_1=-4$   $\mu_2=4$   $\text{Corr}=-0.75$**

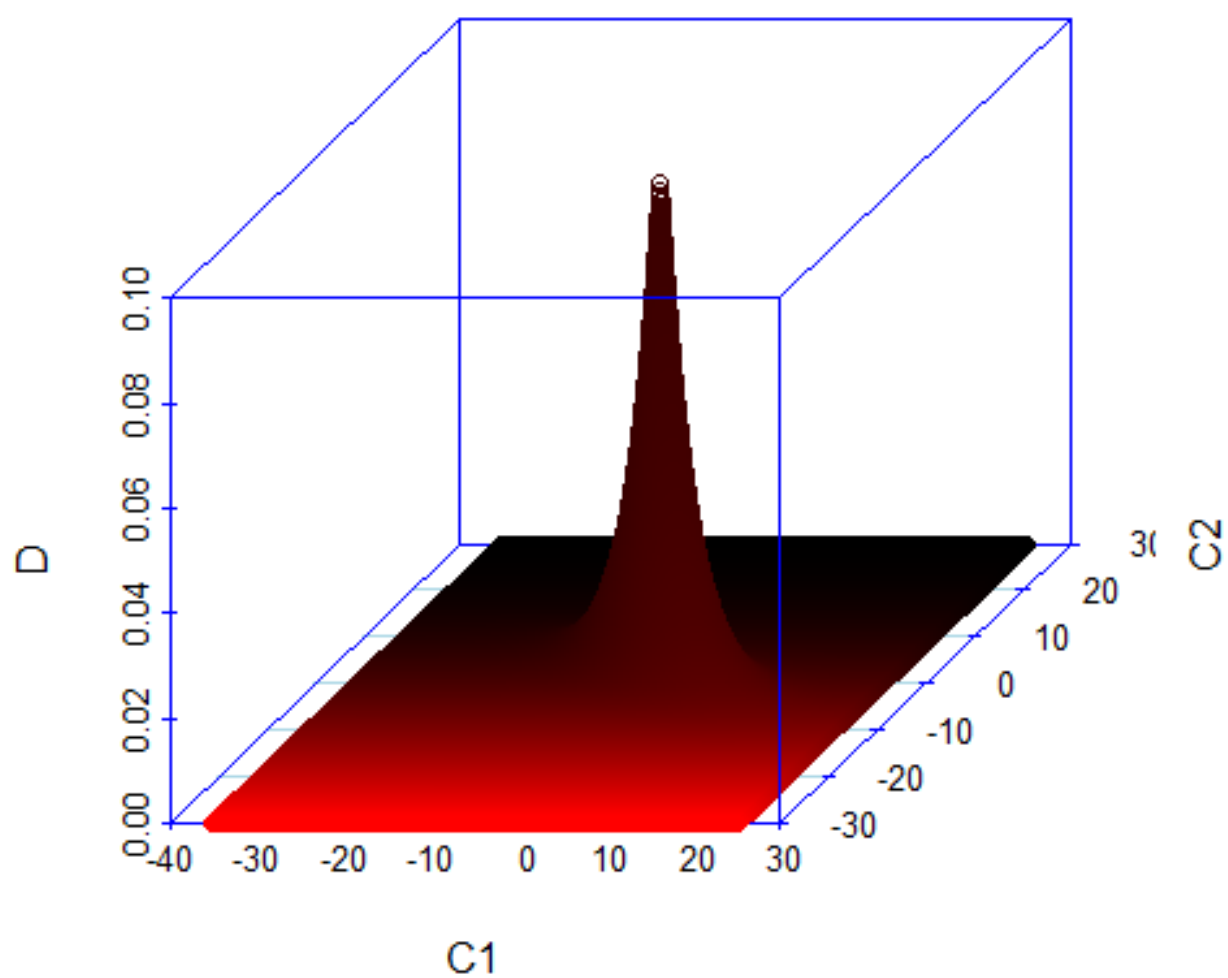

Supplement: Supplementary file 4 [file 1]
