# Supplementary material
Source: publisher figshare collection journal article supplement (https://gsajournals.figshare.com/articles/dataset/_/10689380)

Trace plot of SIGMA11 post-burn (2000 samples in each of chains 1-6)  
1:Black 2:Red 3:Blue  
4:Green 5:Magenta 6:Gray

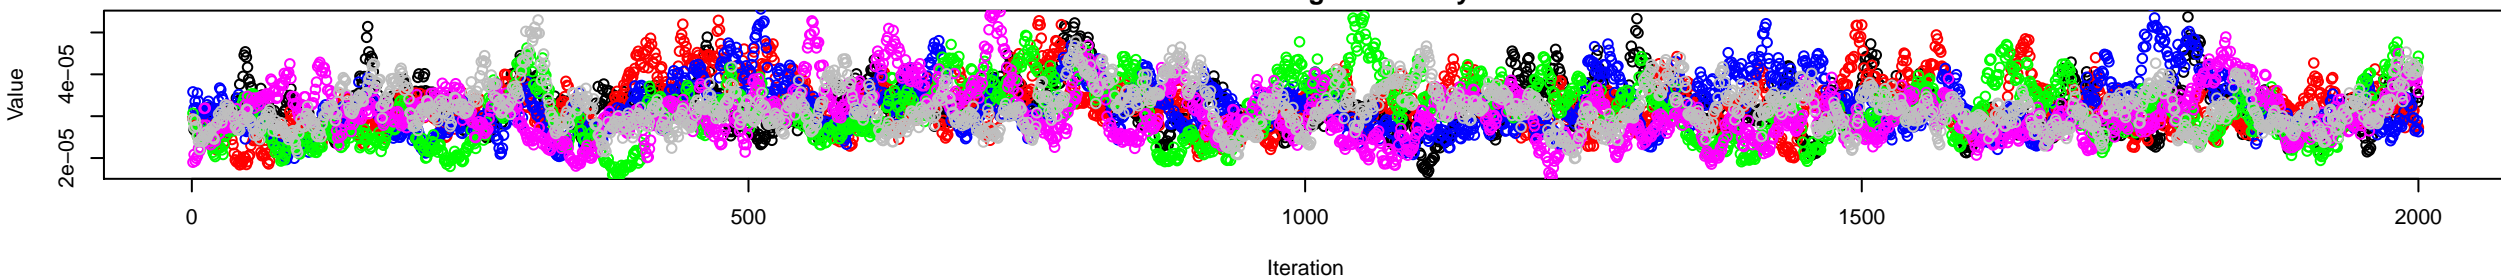

Trace plot of SIGMA12 post-burn (2000 samples in each of chains 1-6)  
1:Black 2:Red 3:Blue  
4:Green 5:Magenta 6:Gray

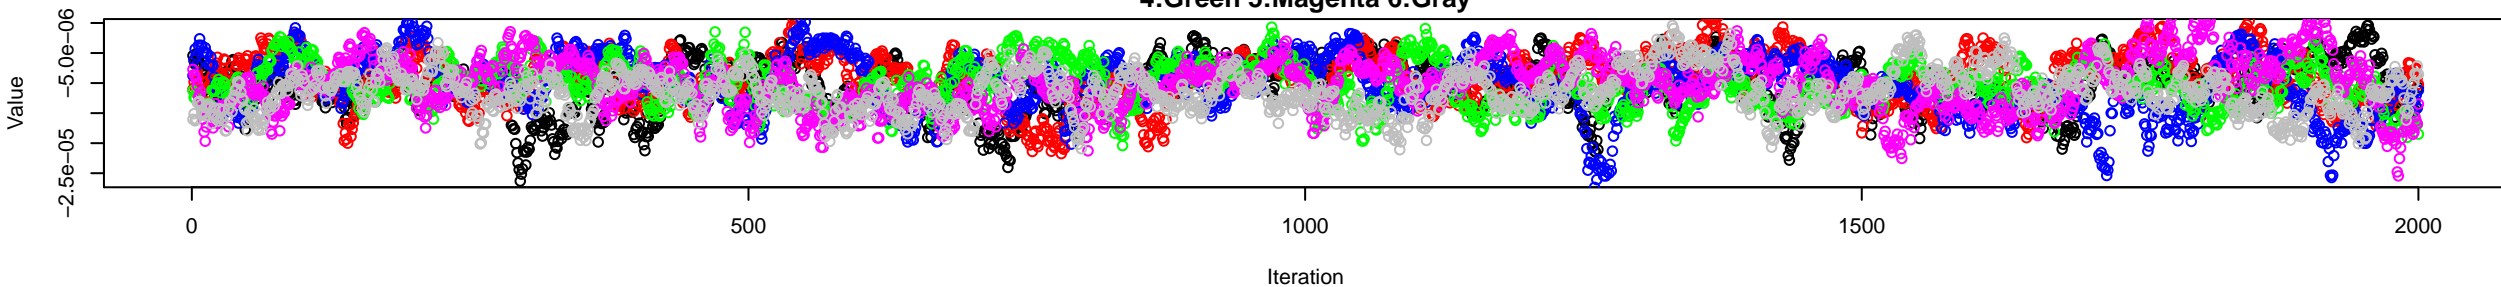

Trace plot of SIGMA22 post-burn (2000 samples in each of chains 1-6)  
1:Black 2:Red 3:Blue  
4:Green 5:Magenta 6:Gray

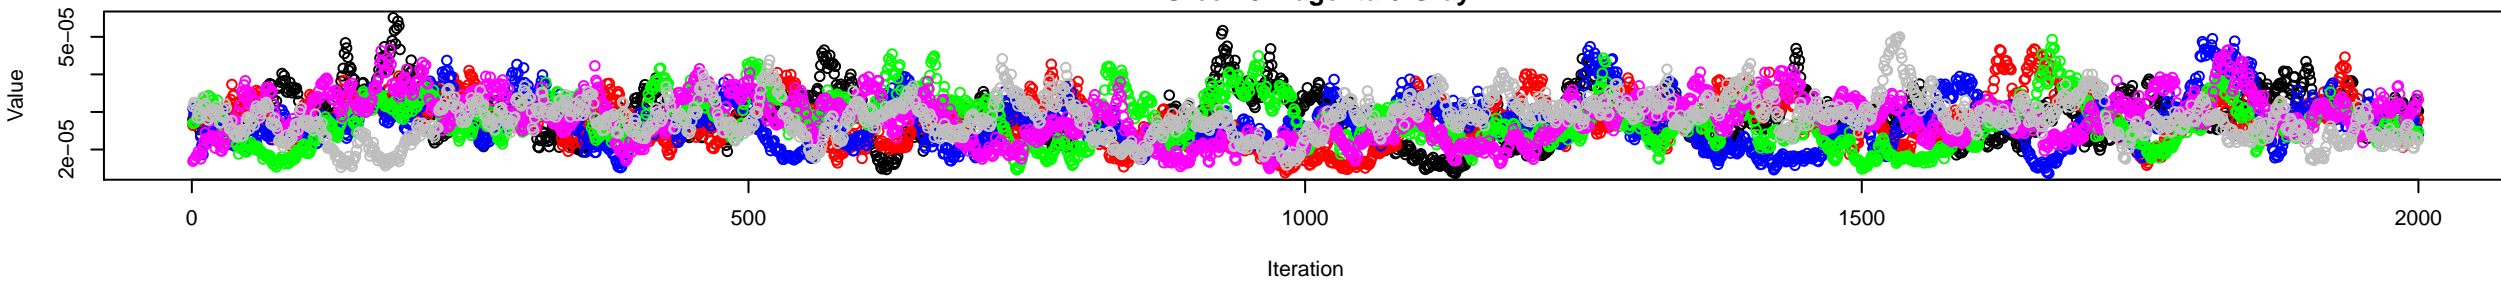

Supplement: Supplementary file 7 [file 1]
