# Supplementary material
Source: publisher figshare collection journal article supplement (https://gsajournals.figshare.com/articles/dataset/_/10689380)
Supplement: Supplementary file 8 [file 1]

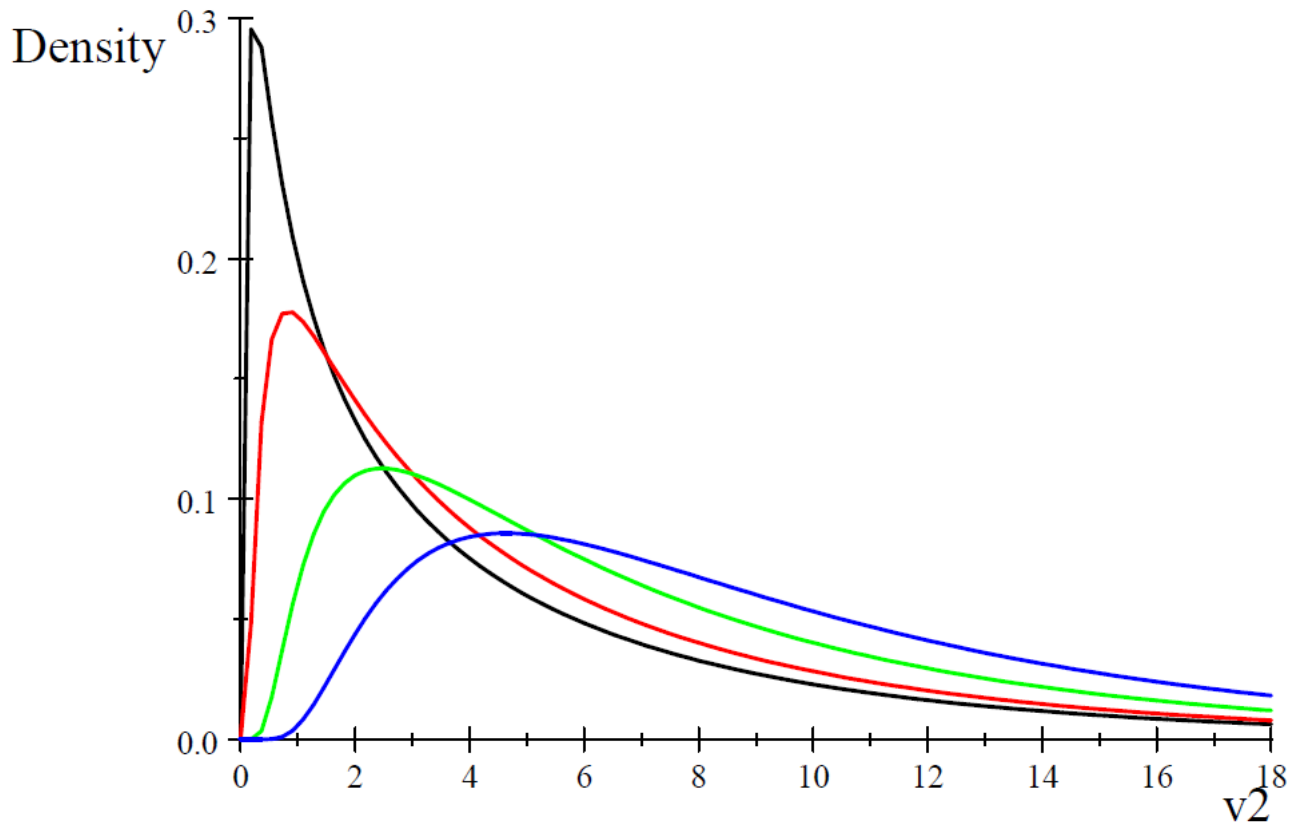

Figure 3. Normalized densities of conditional posterior distributions of the mixing variable  $v^2$  at  $Q = \frac{1}{2}$  (Black); 1 (Red); 4 (Green), and 10 (Blue).
