# Supplementary material
Source: publisher figshare collection journal article supplement (https://gsajournals.figshare.com/articles/dataset/_/10689380)

Trace plot of R011 post-burn (2000 samples in each of chains 1–6)

1:Black 2:Red 3:Blue  
4:Green 5:Magenta 6:Gray

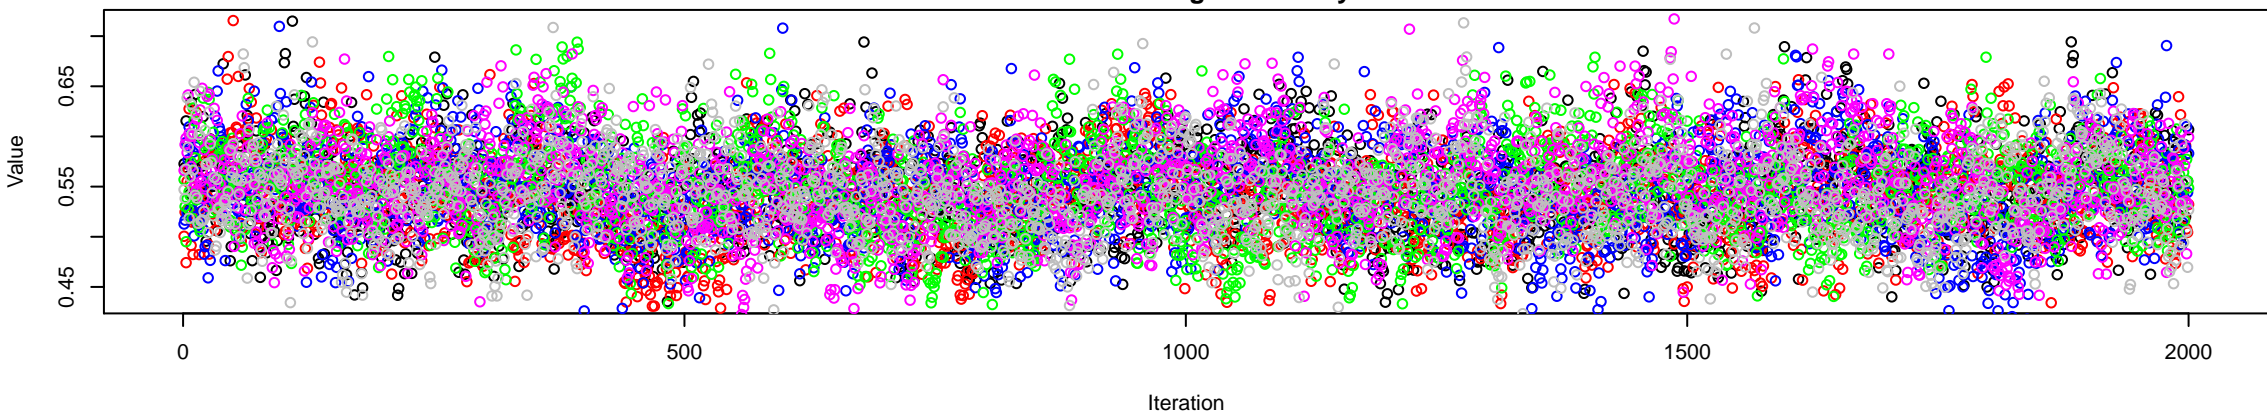

Trace plot of R012 post-burn (2000 samples in each of chains 1–6)

1:Black 2:Red 3:Blue  
4:Green 5:Magenta 6:Gray

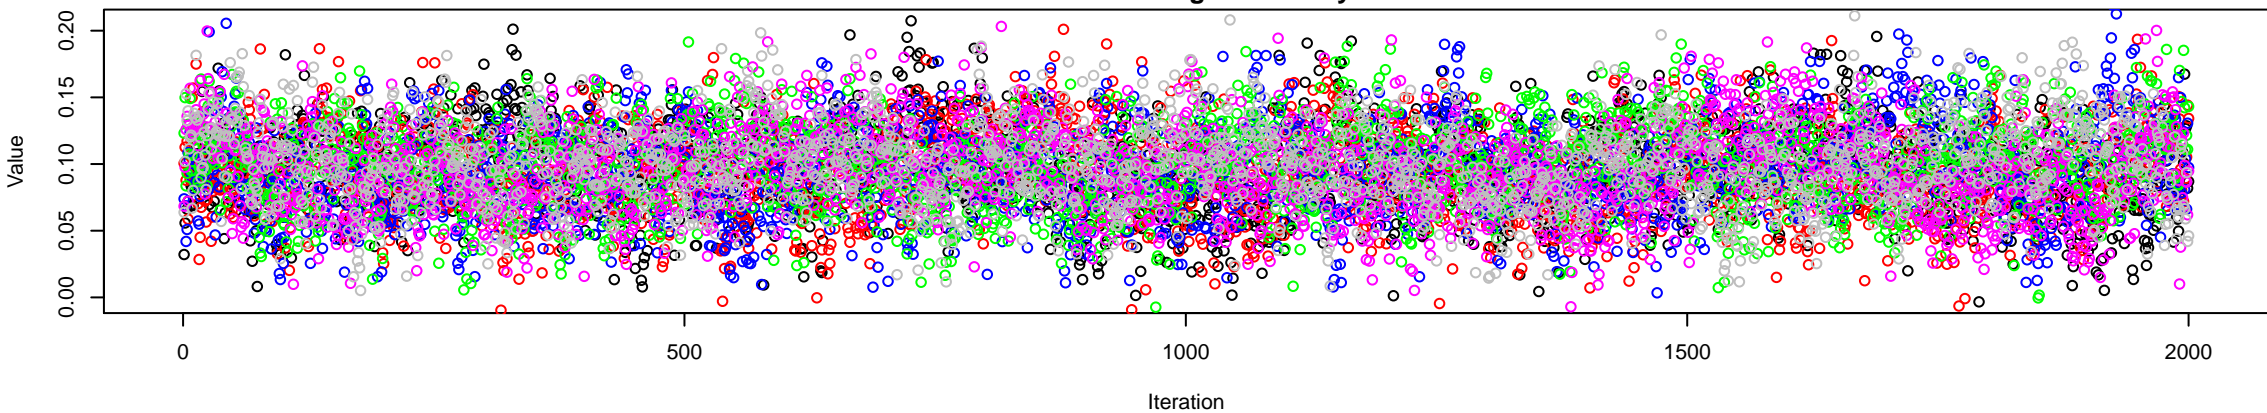

Trace plot of R022 post-burn (2000 samples in each of chains 1–6)

1:Black 2:Red 3:Blue  
4:Green 5:Magenta 6:Gray

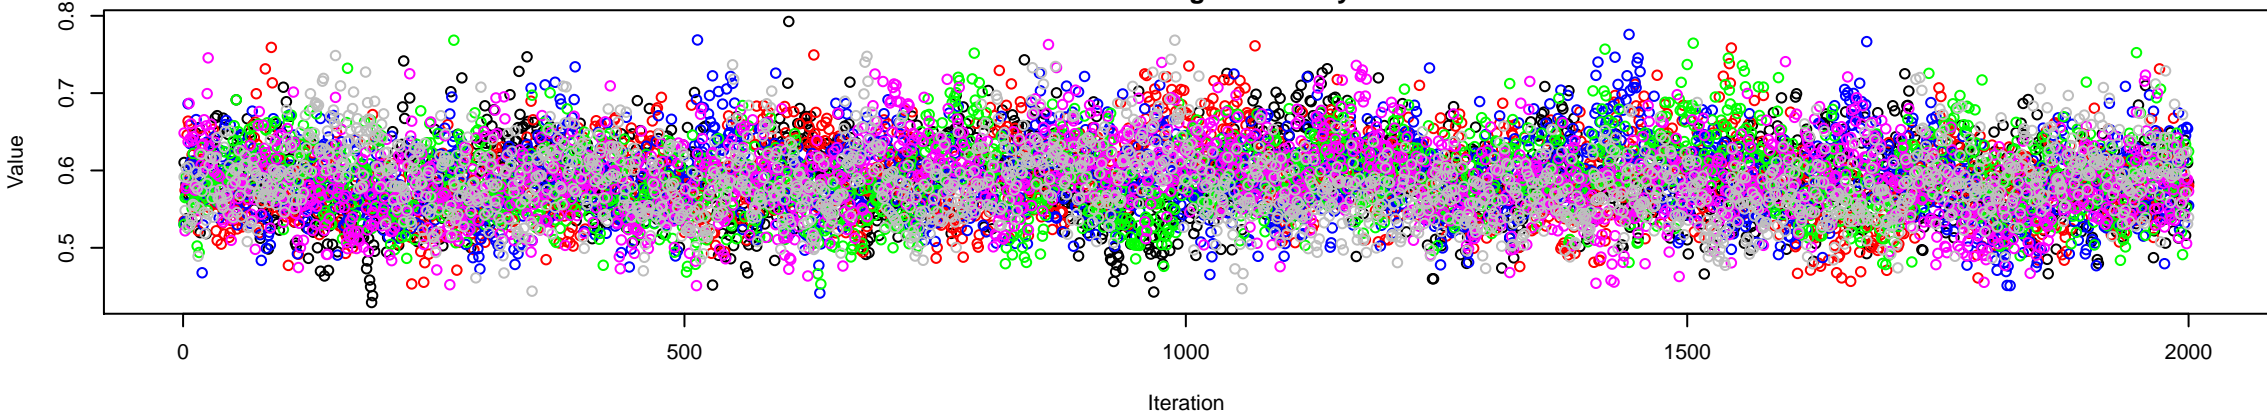

Supplement: Supplementary file 10 [file 1]
