# Supplementary material
Source: publisher figshare collection journal article supplement (https://gsajournals.figshare.com/articles/dataset/_/10689380)

**Densities: DE (black) normal (blue) empirical (red)**  
**of bivariate Laplace samples (Corr= 0):**  
**coordinate 1**

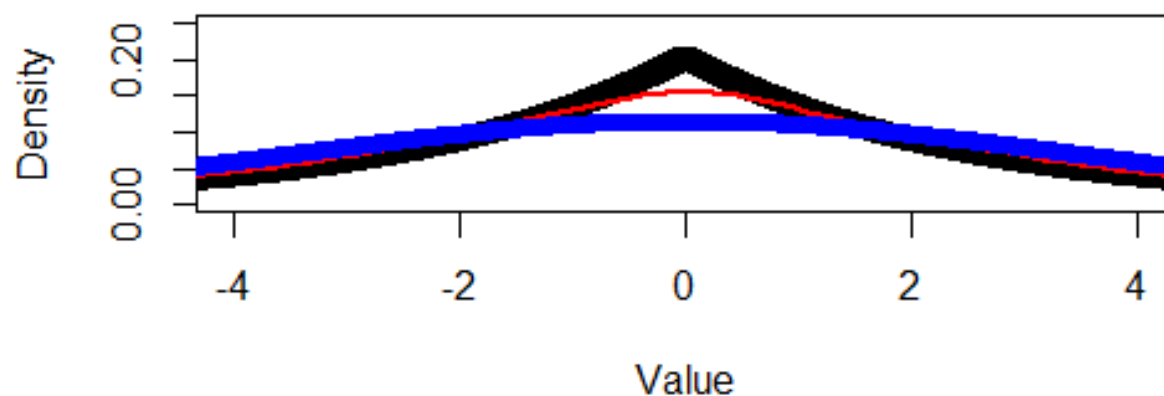

**Densities: DE (black) normal (blue) empirical (green)**  
**of bivariate Laplace samples (Corr= 0):**  
**coordinate 2**

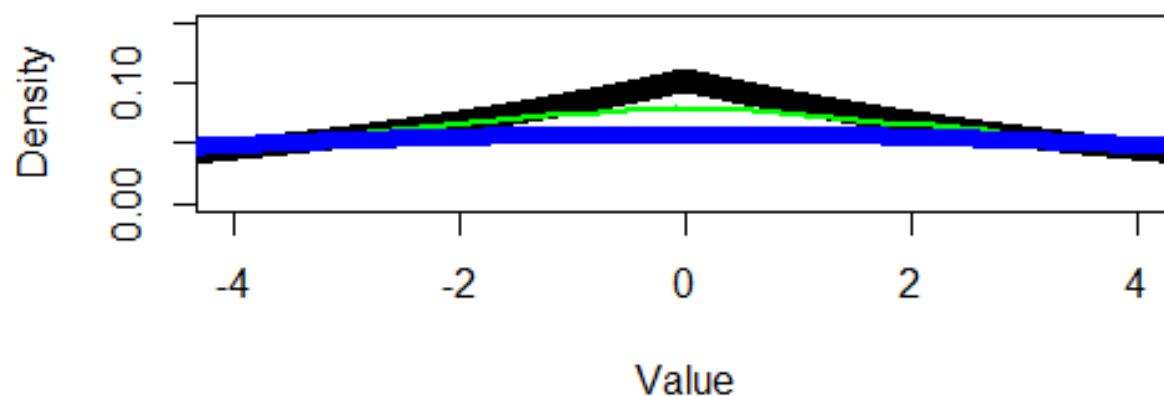

**Densities: DE (black) normal (blue) empirical (red)**  
**of bivariate Laplace samples (Corr= 0.5):**  
**coordinate 1**

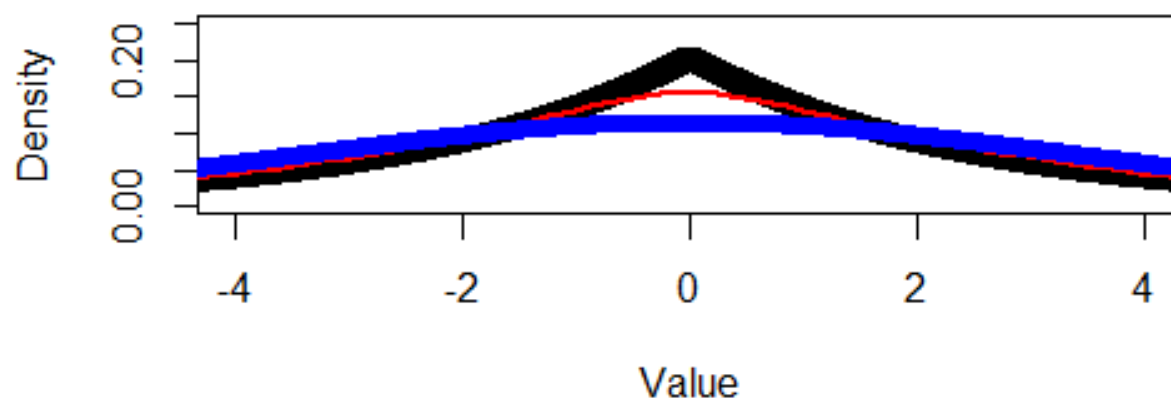

**Densities: DE (black) normal (blue) empirical (green)**  
**of bivariate Laplace samples (Corr= 0.5):**  
**coordinate 2**

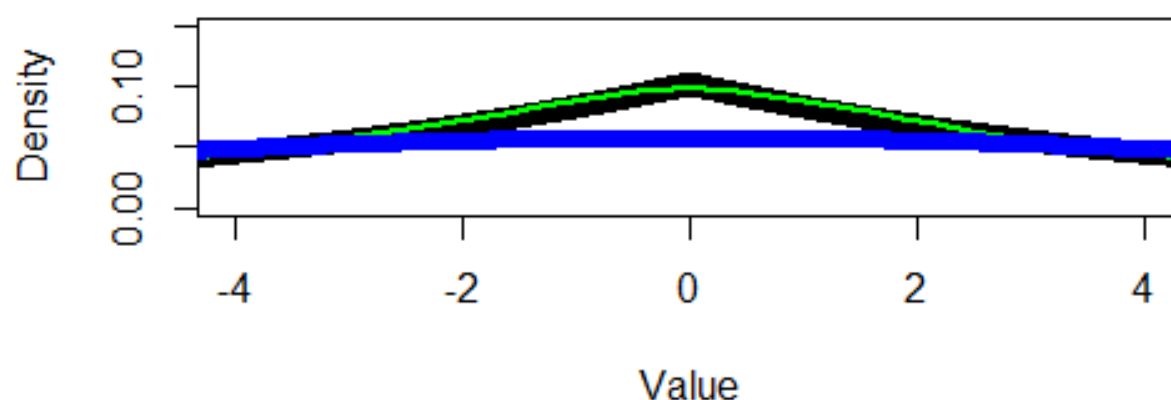

**Densities: DE (black) normal (blue) empirical (red)**  
**of bivariate Laplace samples (Corr=-0.75):**  
**coordinate 1**

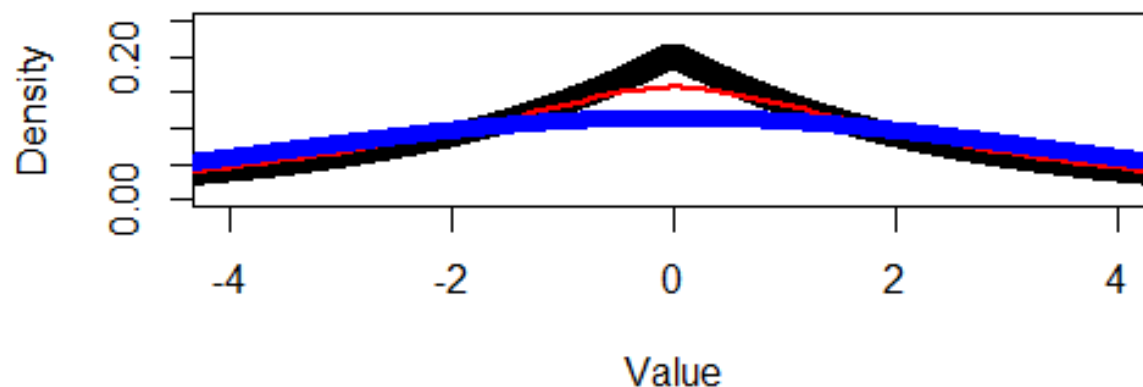

**Densities: DE (black) normal (blue) empirical (red)**  
**of bivariate Laplace samples (Corr=-0.75):**  
**coordinate 2**

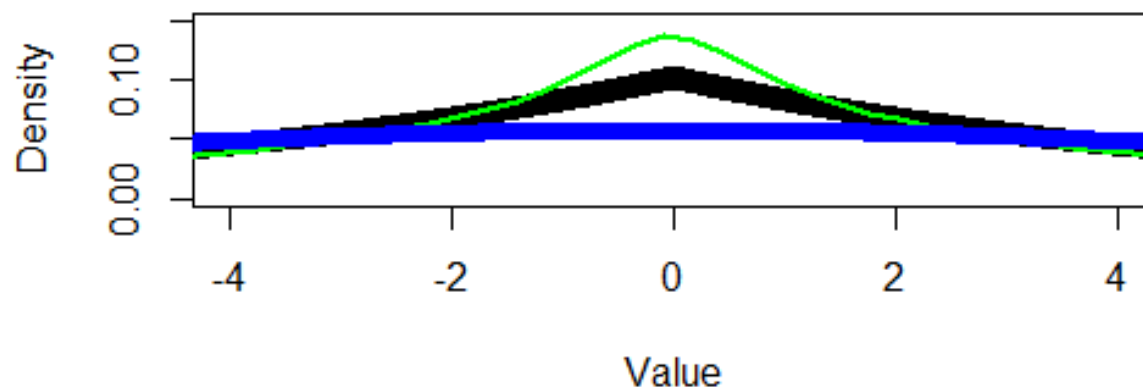

Supplement: Supplementary file 12 [file 1]
