# Supplementary material
Source: publisher figshare collection journal article supplement (https://gsajournals.figshare.com/articles/dataset/_/10689380)

**BLACK=MAP iteration 1 RED=MAP iteration 500**

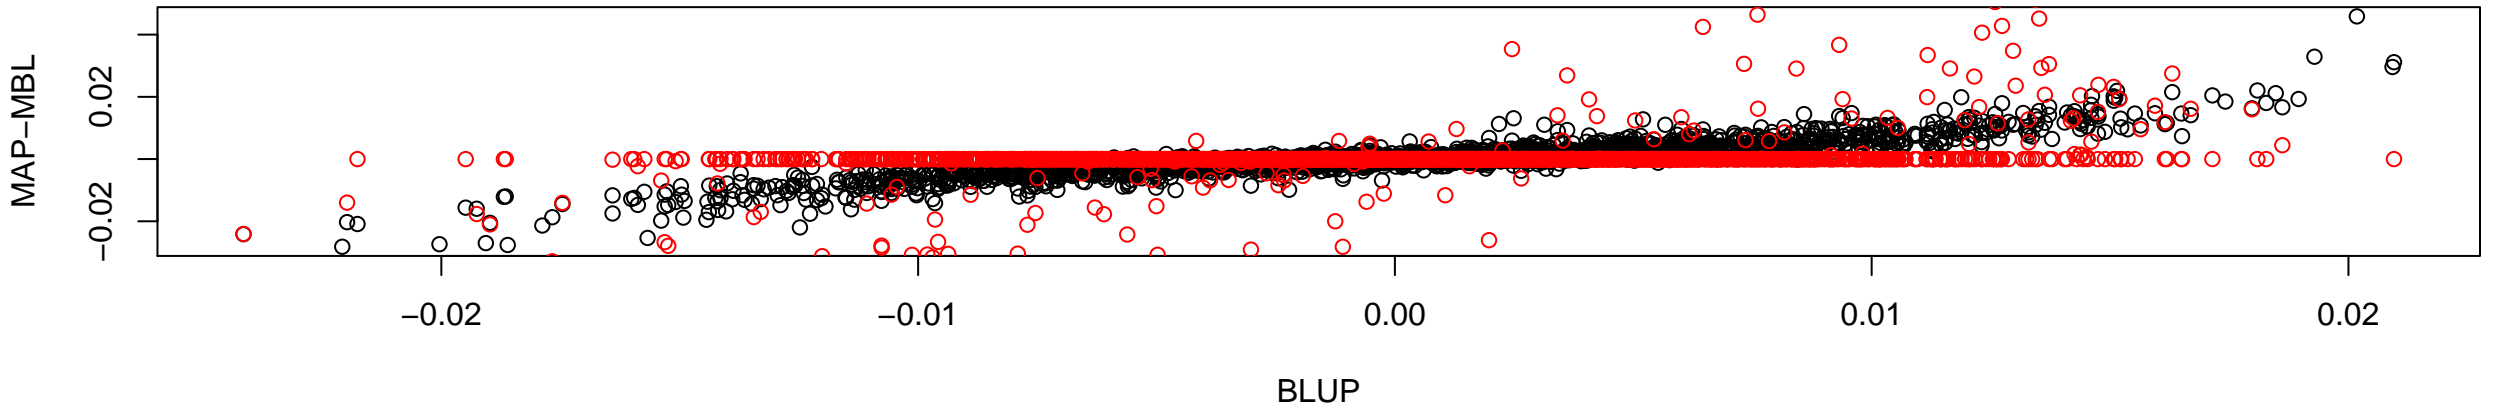

**BLACK=MAP iteration 1 RED=MAP iteration 500**

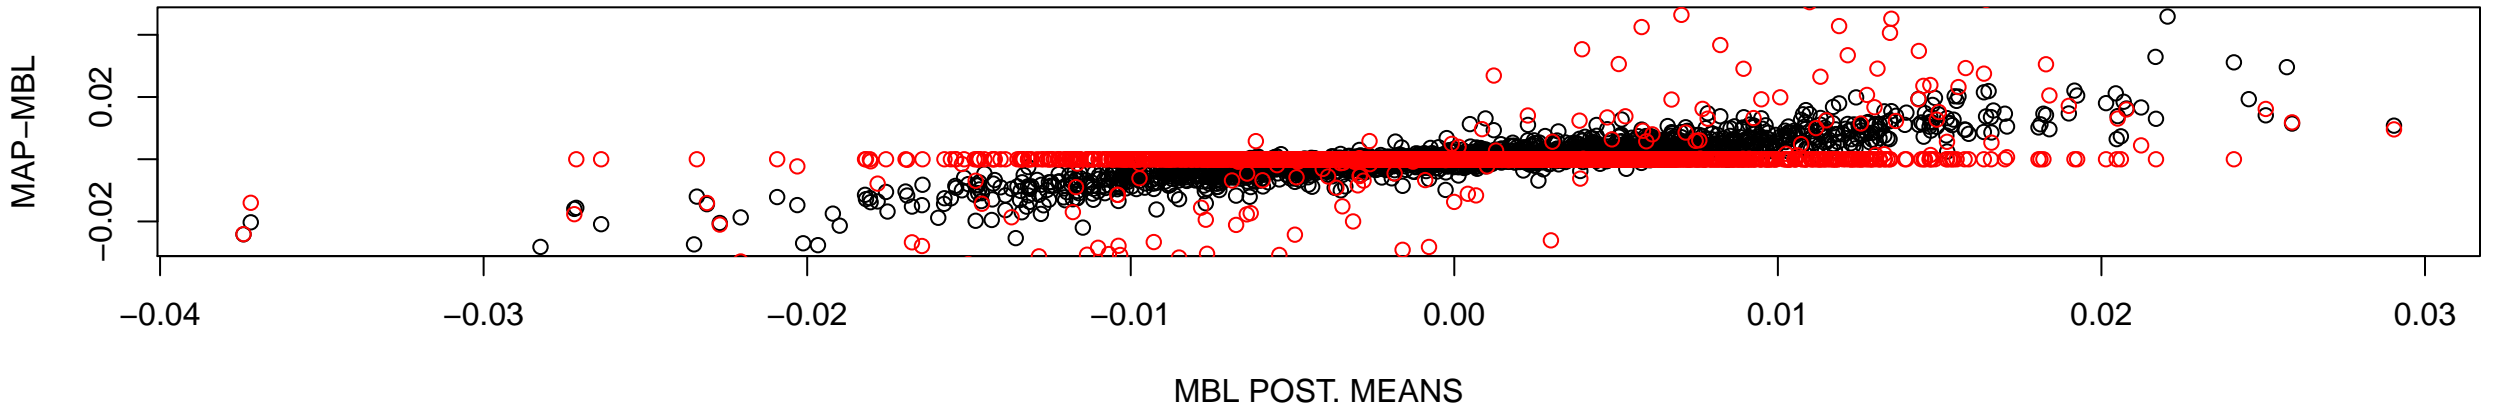

Supplement: Supplementary file 1 [file 1]

# Shrinkage Factor (R): SIGMA[1,1]

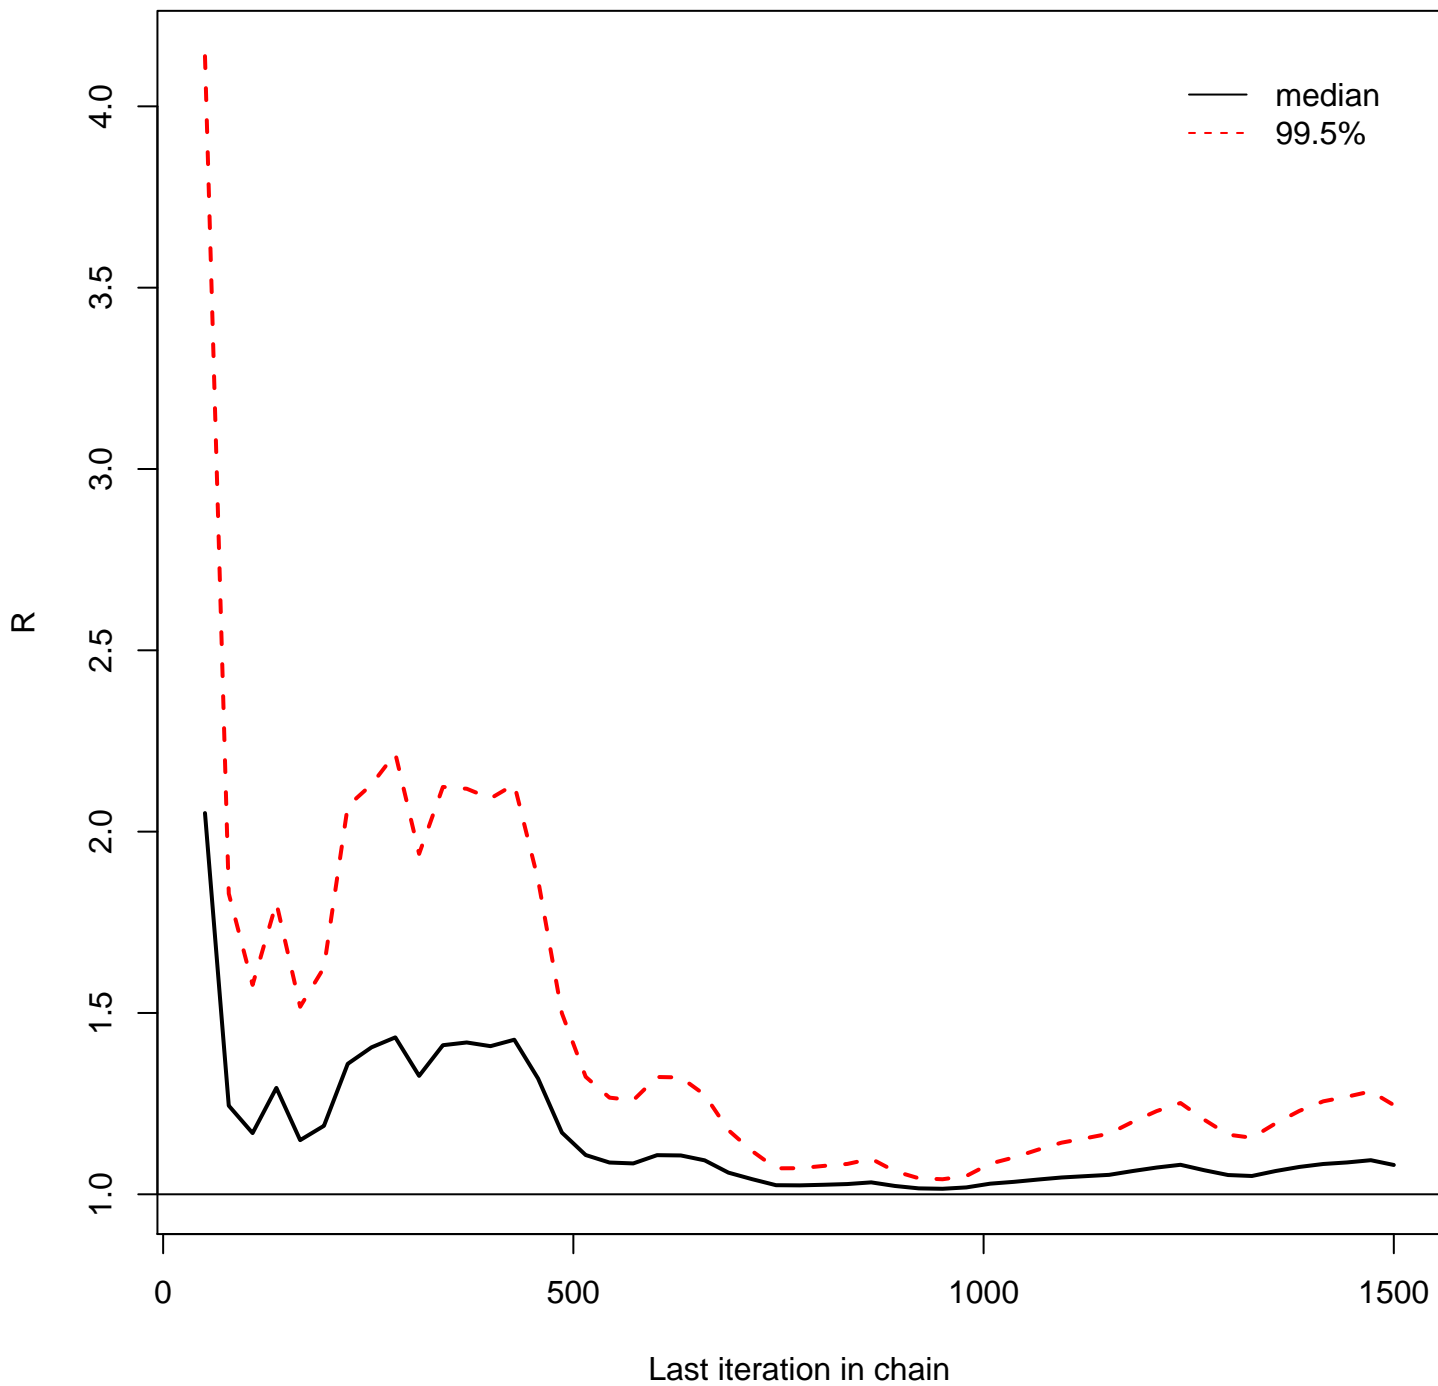

Supplement: Supplementary file 2 [file 1]

## Shrinkage Factor (R): mean trait 1

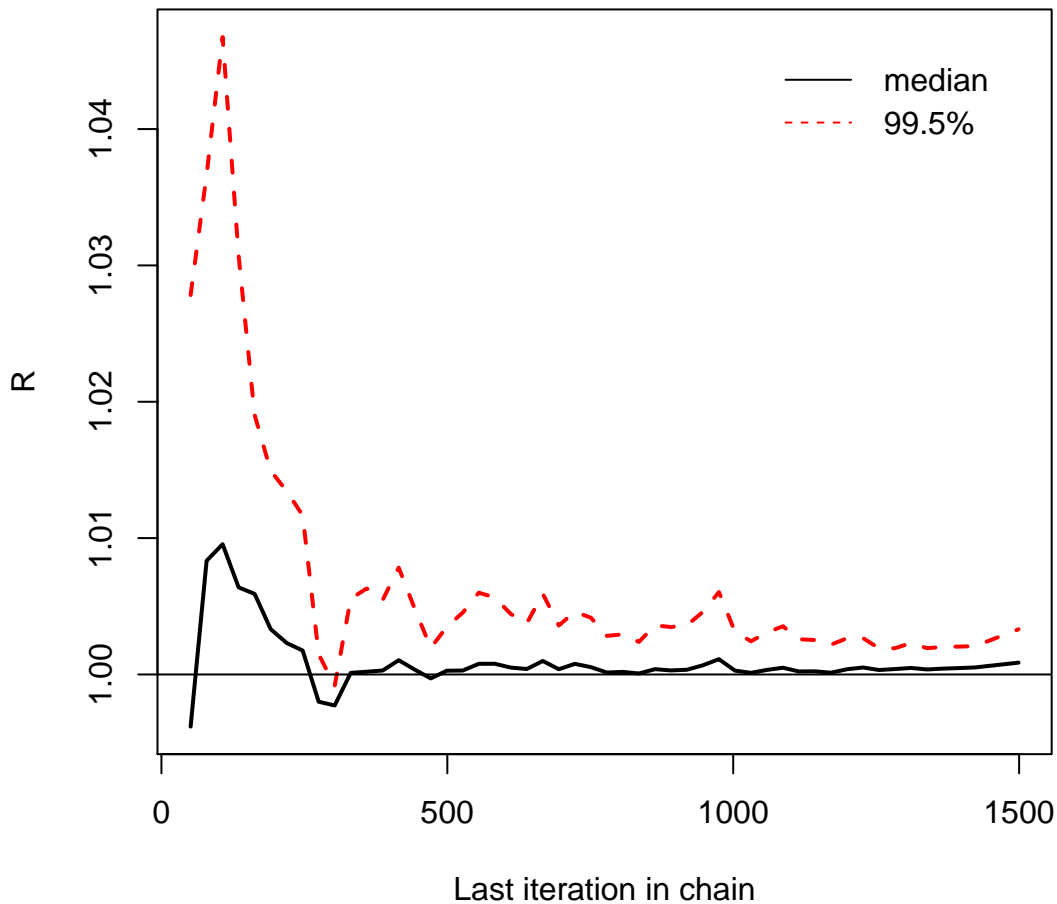

Supplement: Supplementary file 3 [file 1]

## Shrinkage Factor (R): marker 10 trait 1

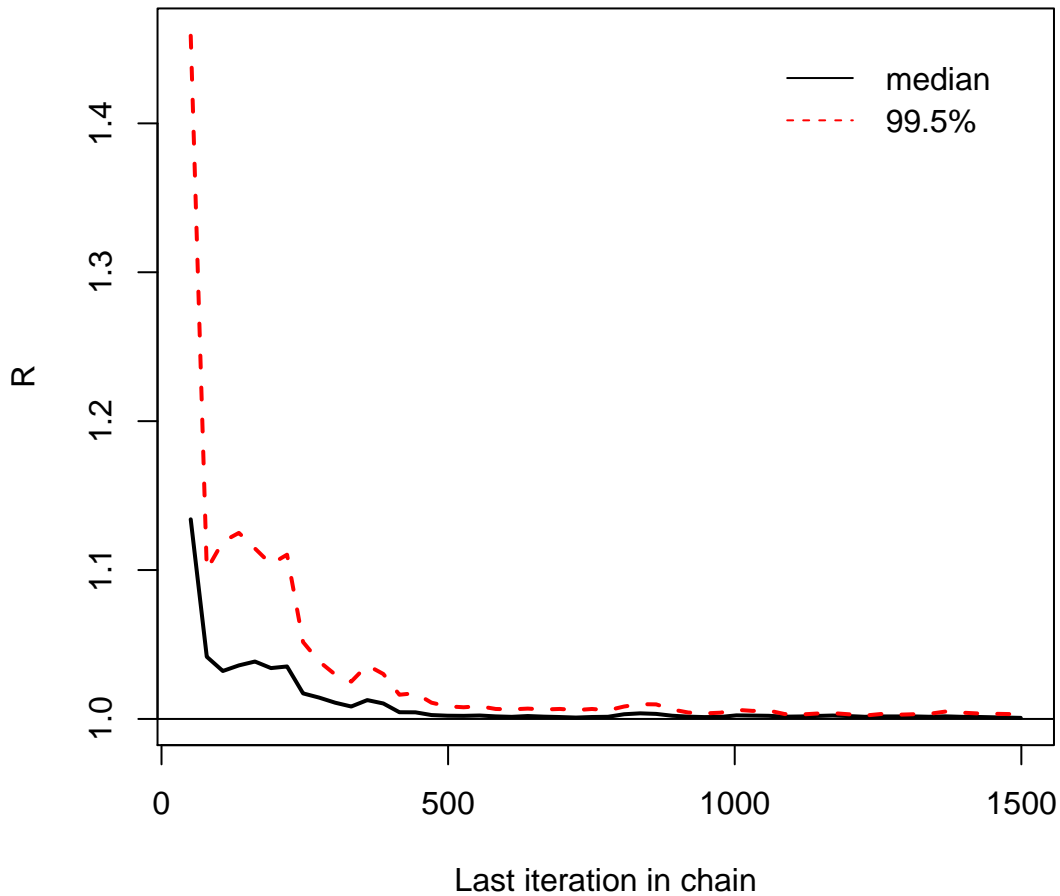

Supplement: Supplementary file 5 [file 1]

**Fitted genomic values:  
BLUP versus MBL (black) or MAP-MBL (red)**

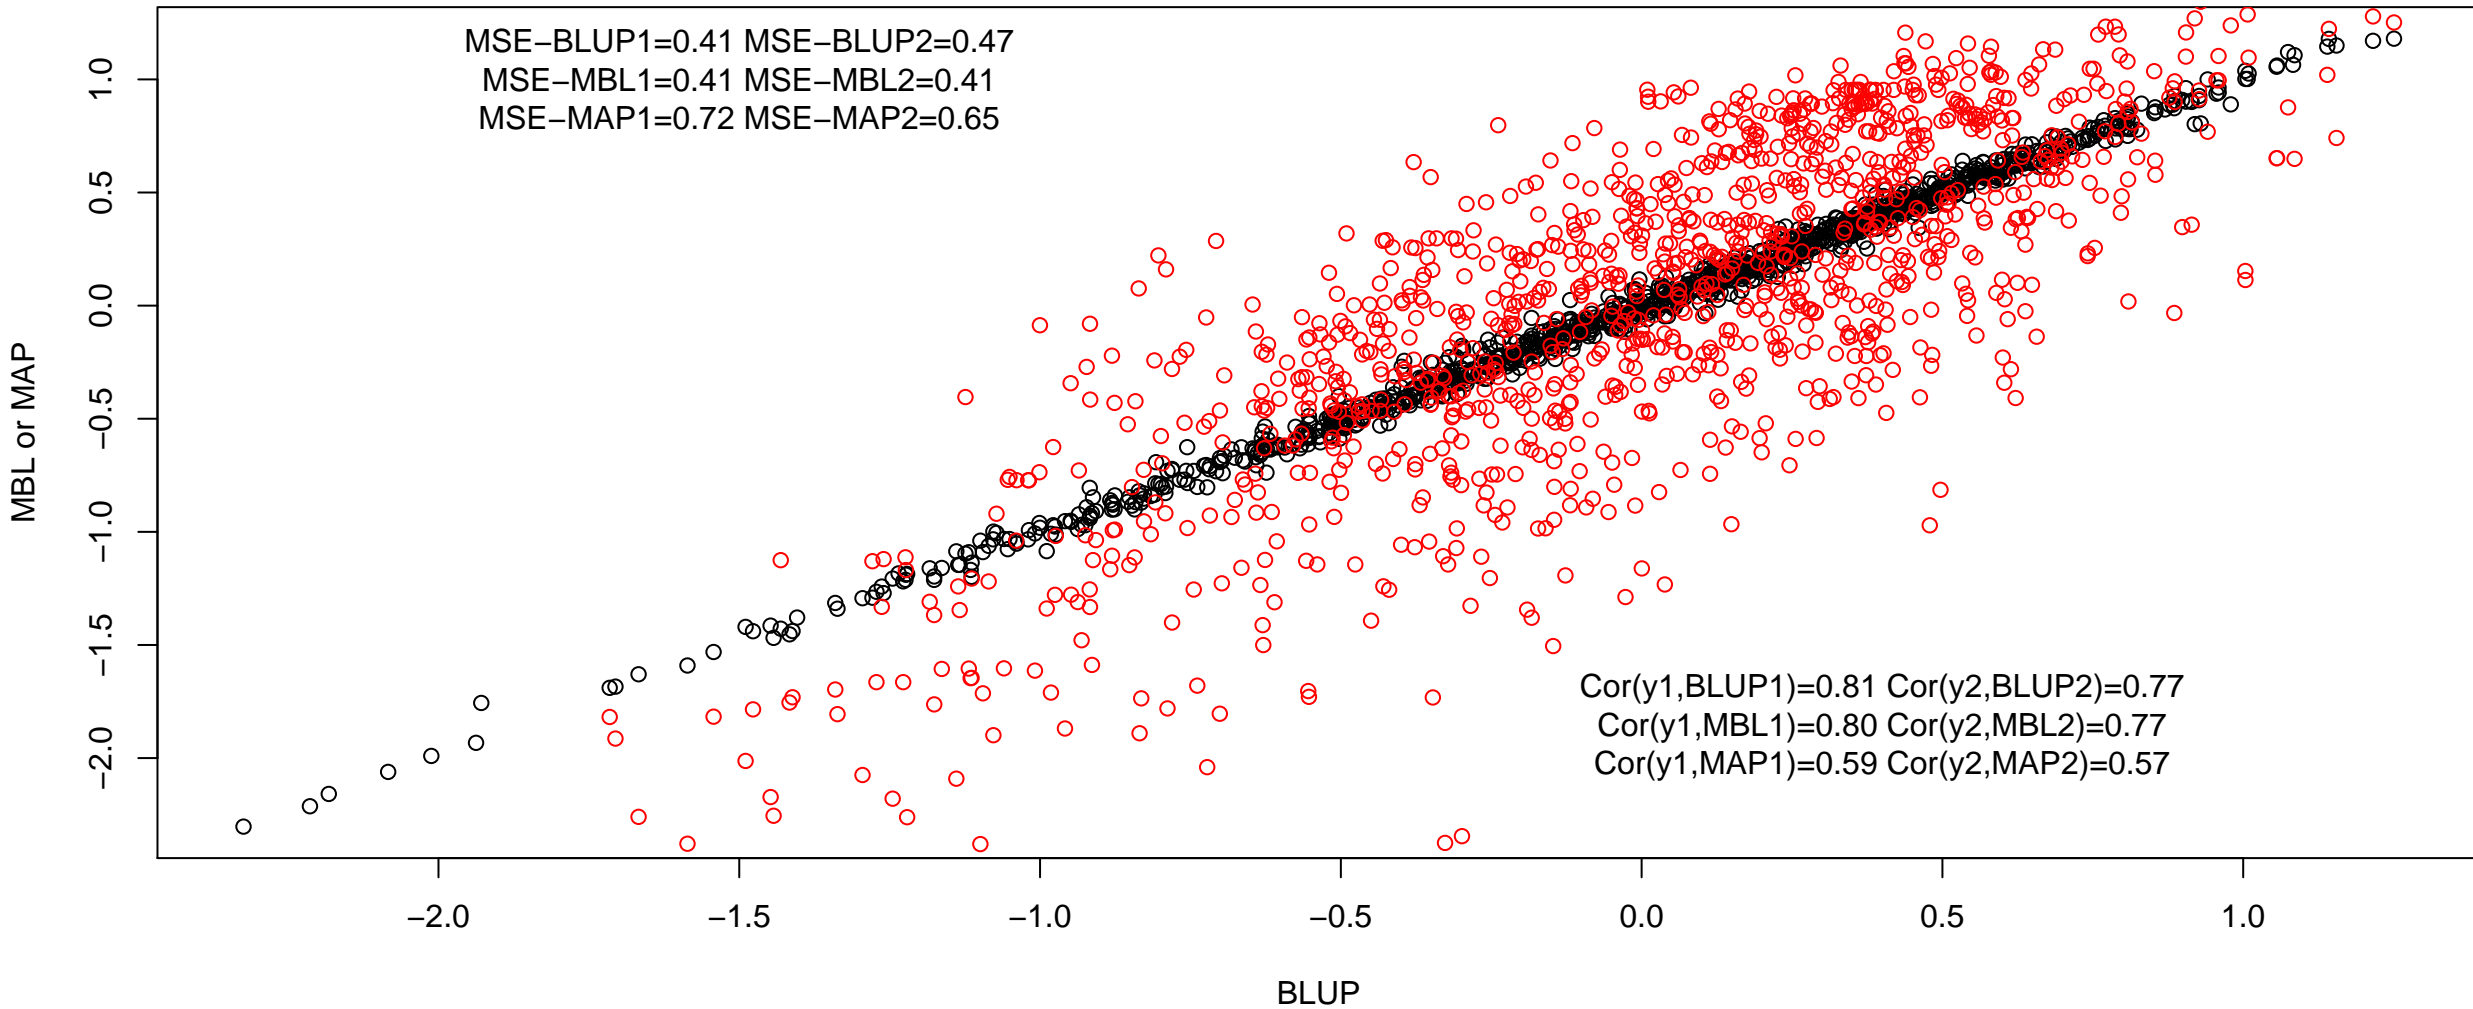

Supplement: Supplementary file 9 [file 1]

Shrinkage Factor (R): R0[1,1]

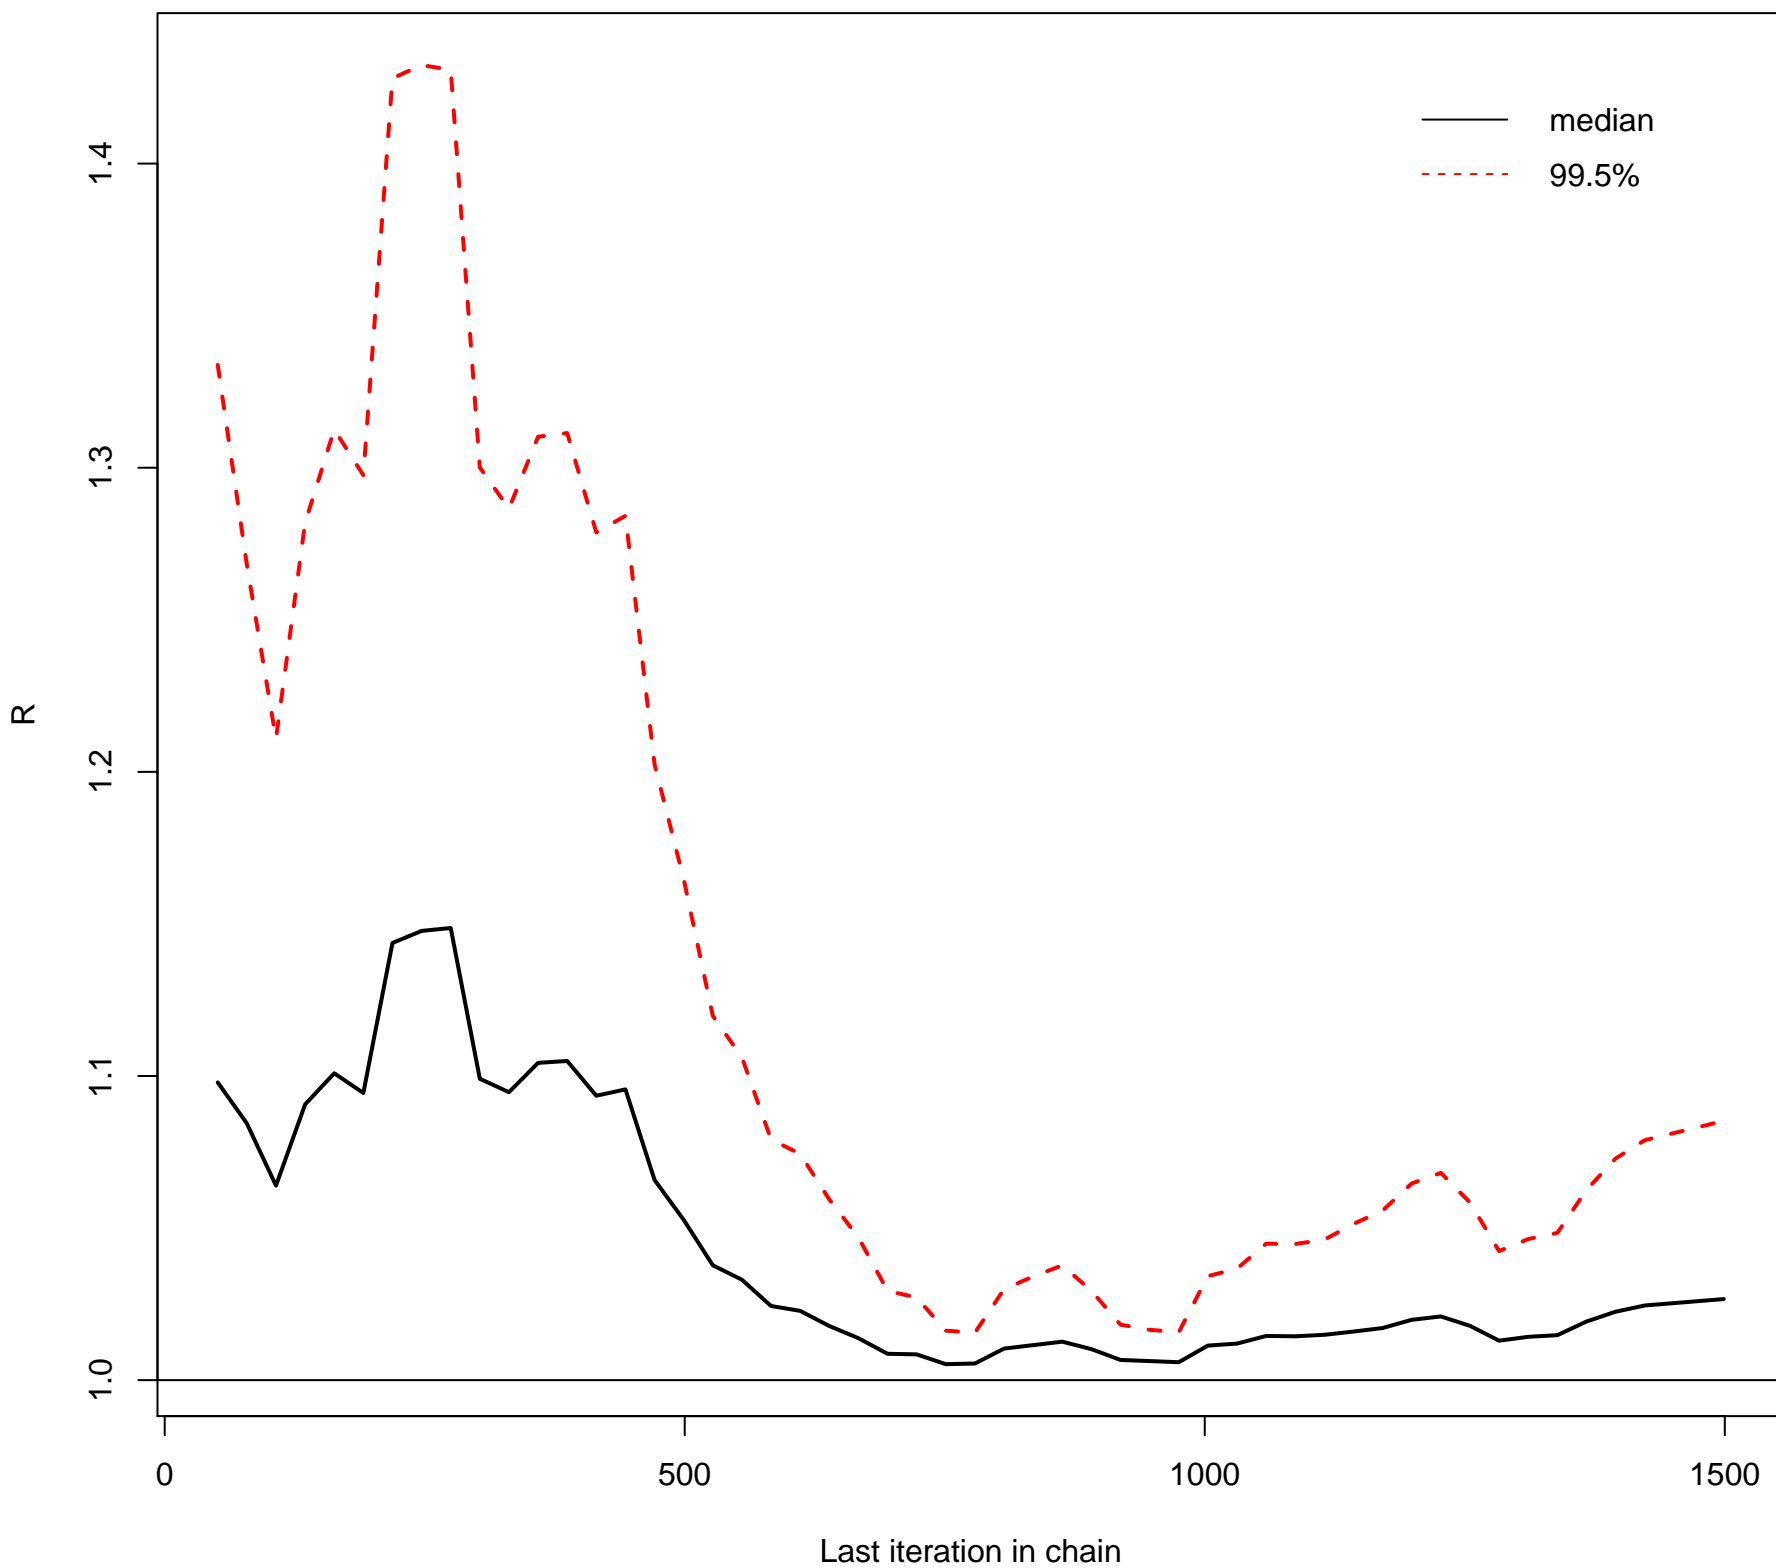

Supplement: Supplementary file 11 [file 1]

## Shrinkage Factor (R): marker 200 trait 2

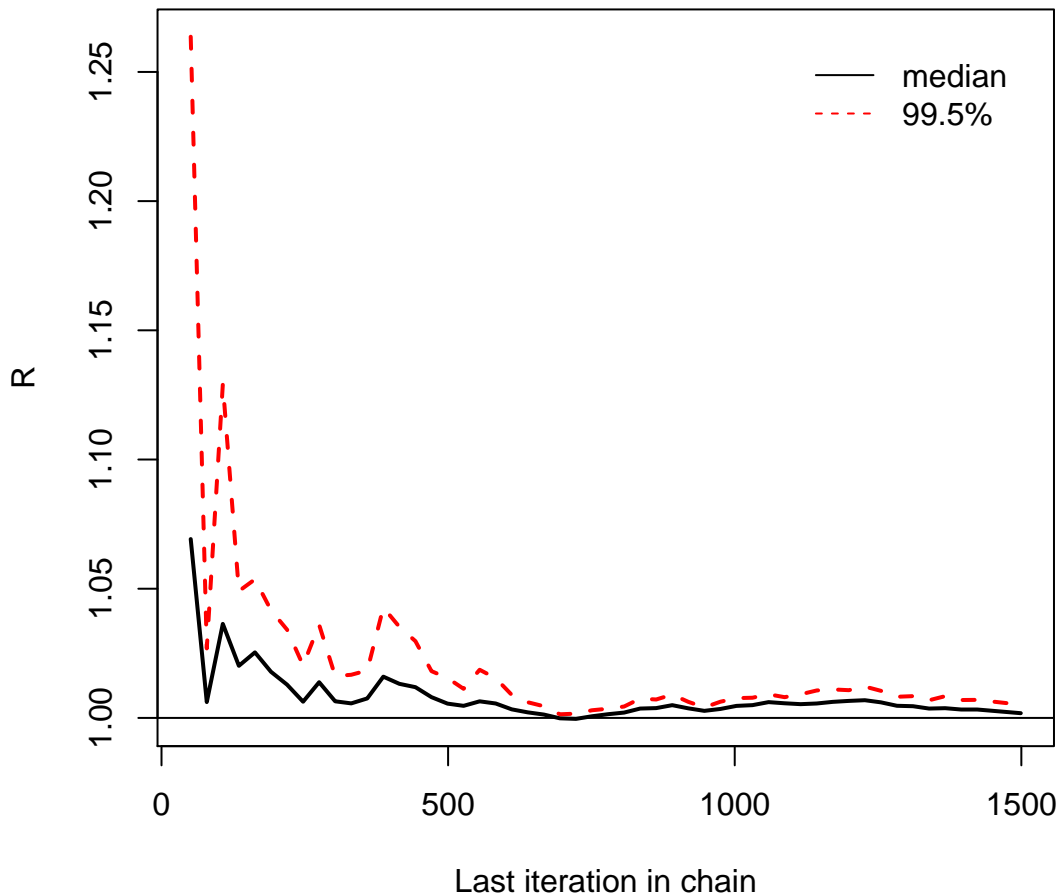

Supplement: Supplementary file 13 [file 1]

## Shrinkage Factor (R): mean trait 2

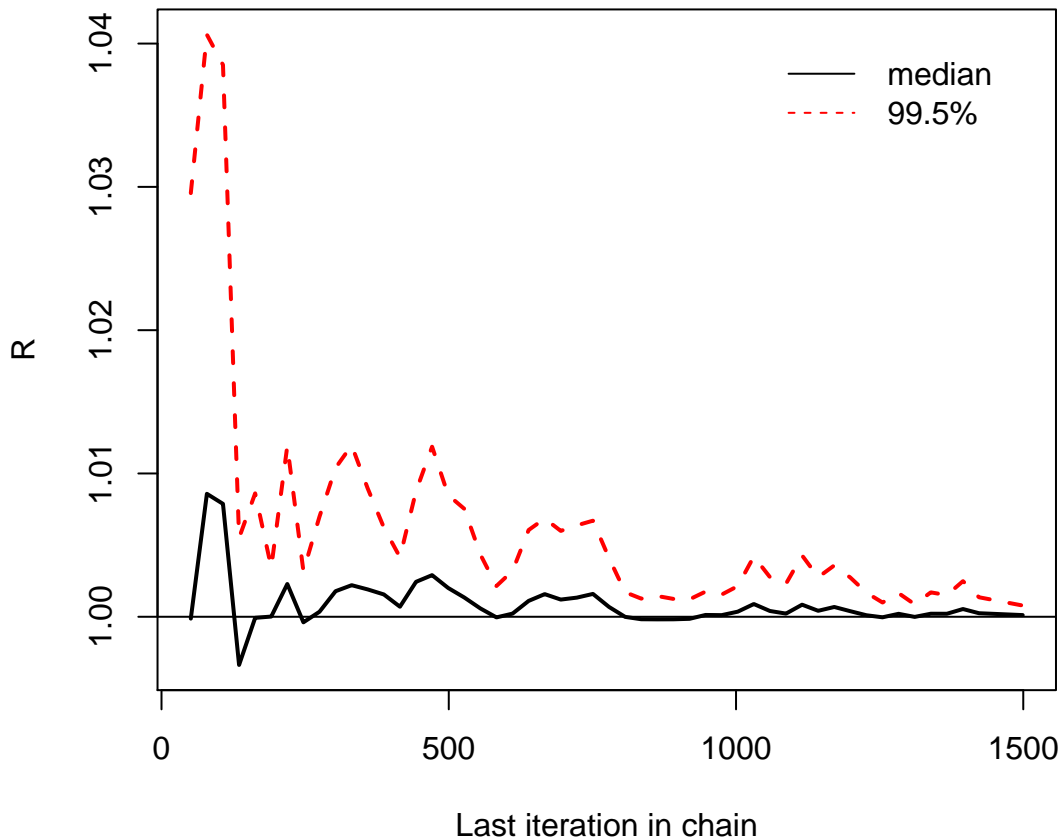

Supplement: Supplementary file 14 [file 1]

# Shrinkage Factor (R): R0[1,2]

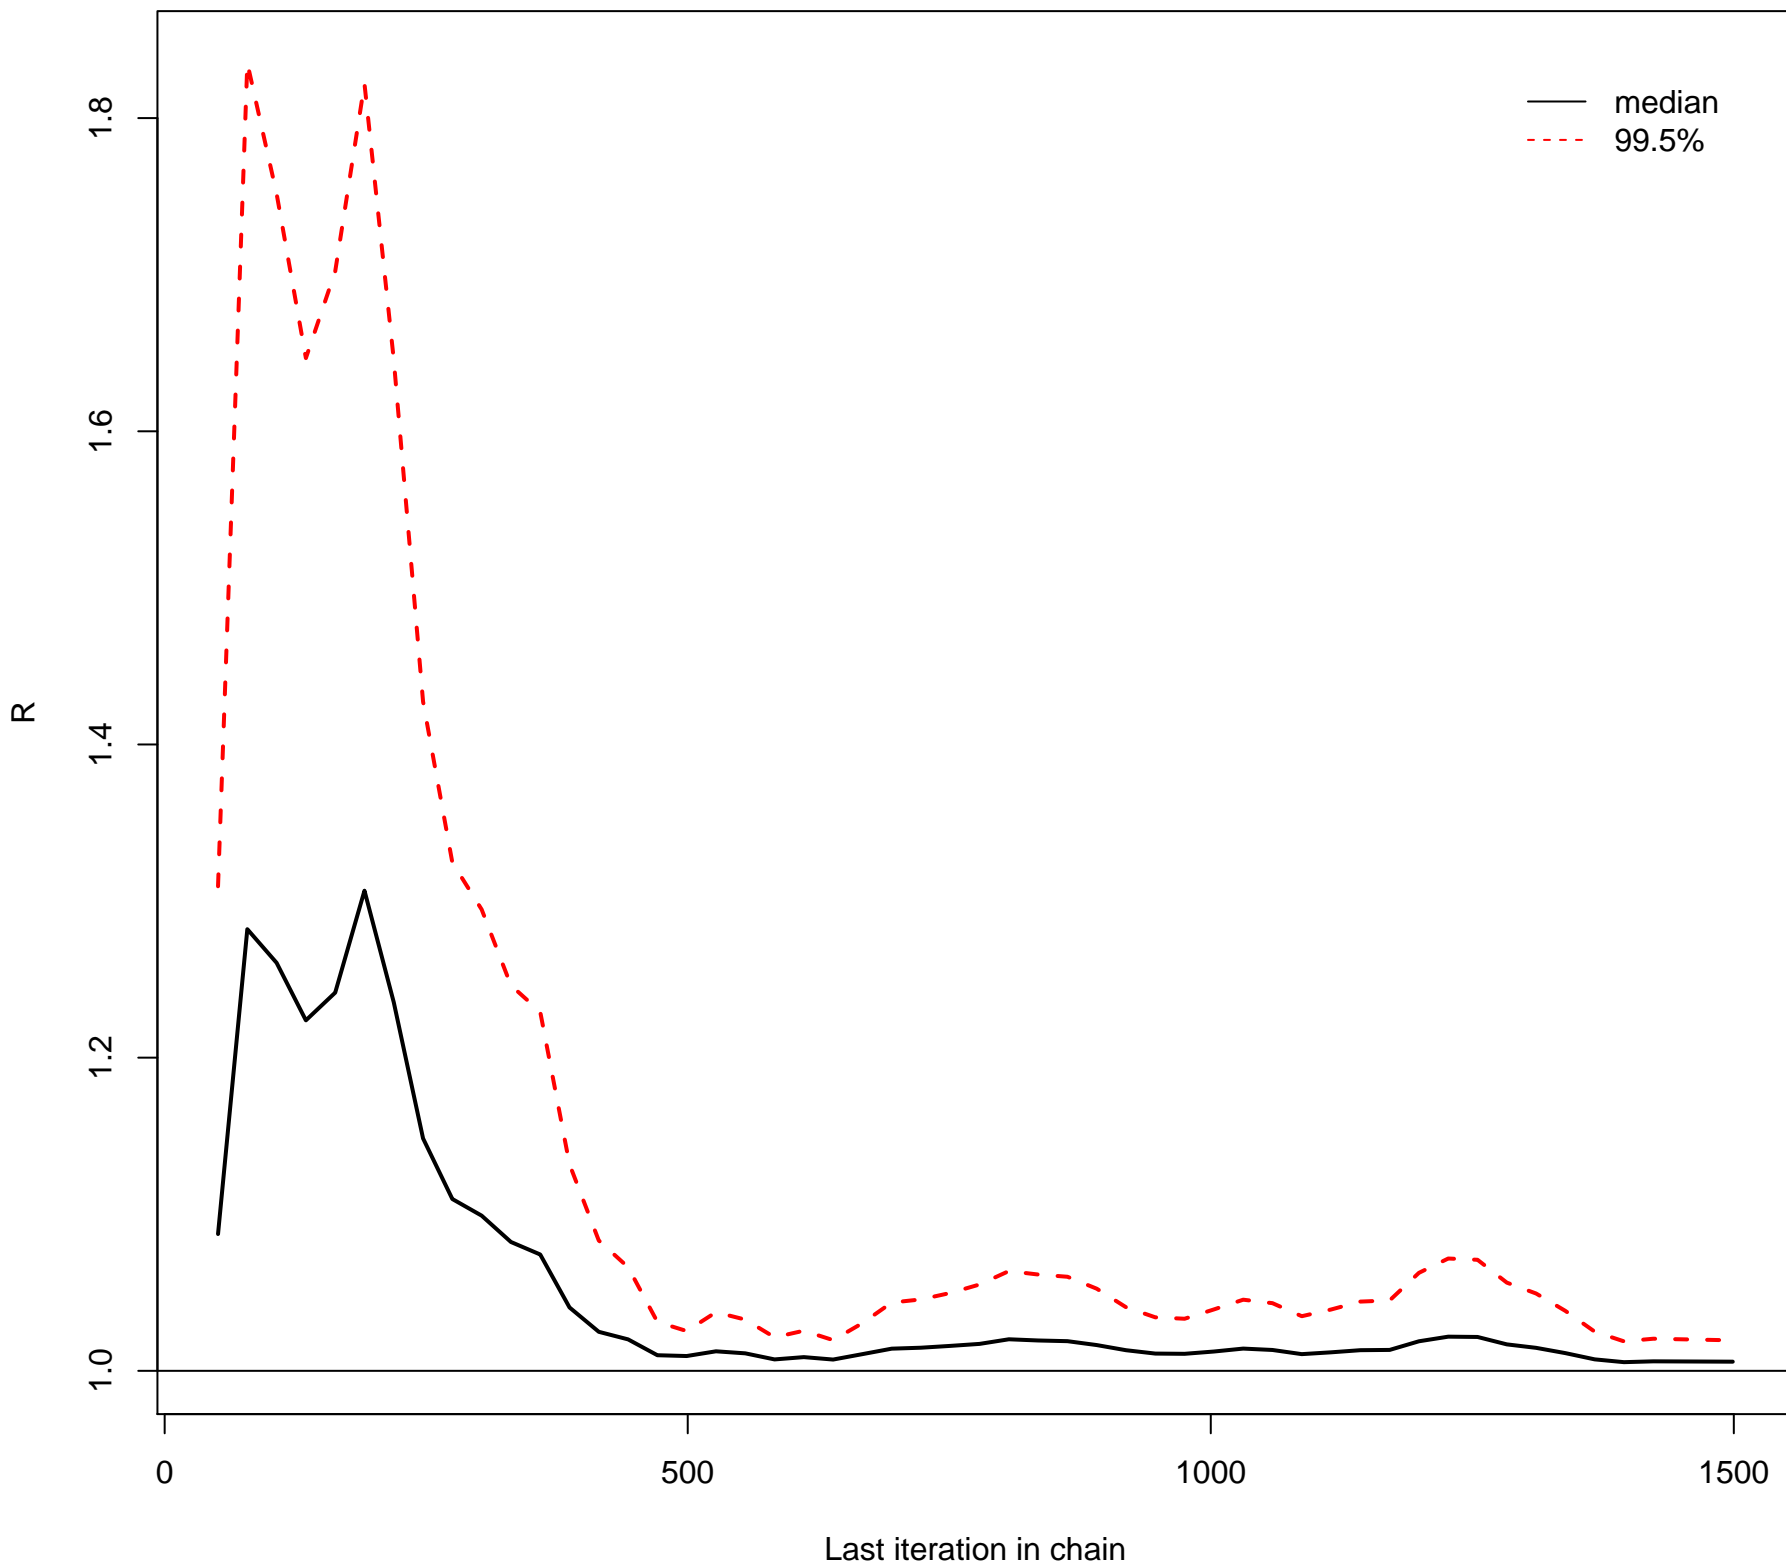

Supplement: Supplementary file 15 [file 1]

Shrinkage Factor (R): R0[2,2] 2

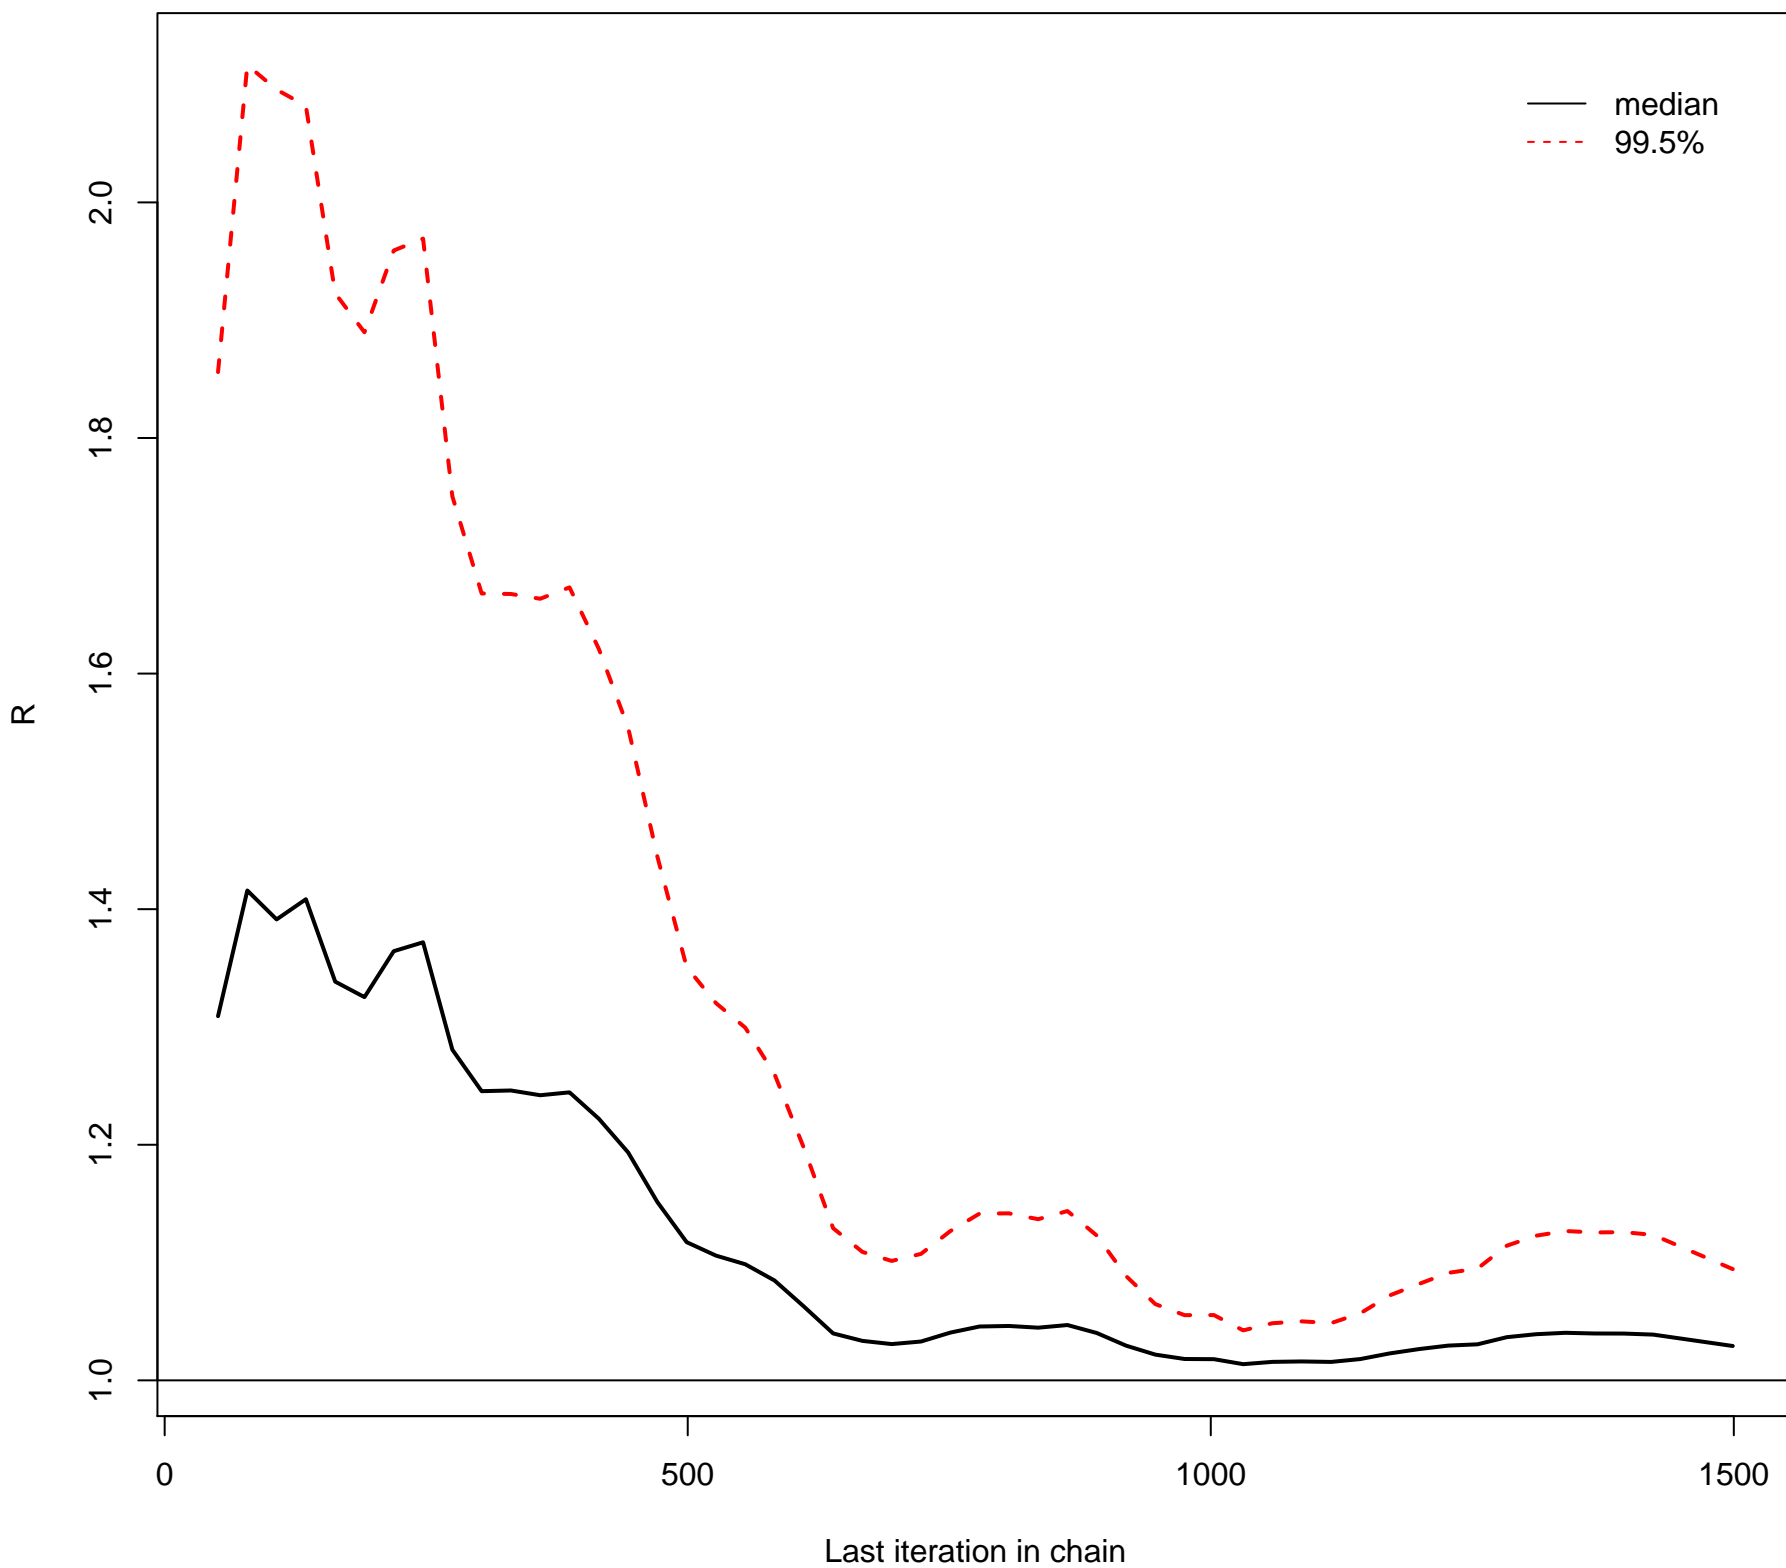

Supplement: Supplementary file 16 [file 1]

# Monitoring convergence in MAP-MBL

## Average m-values by iteration

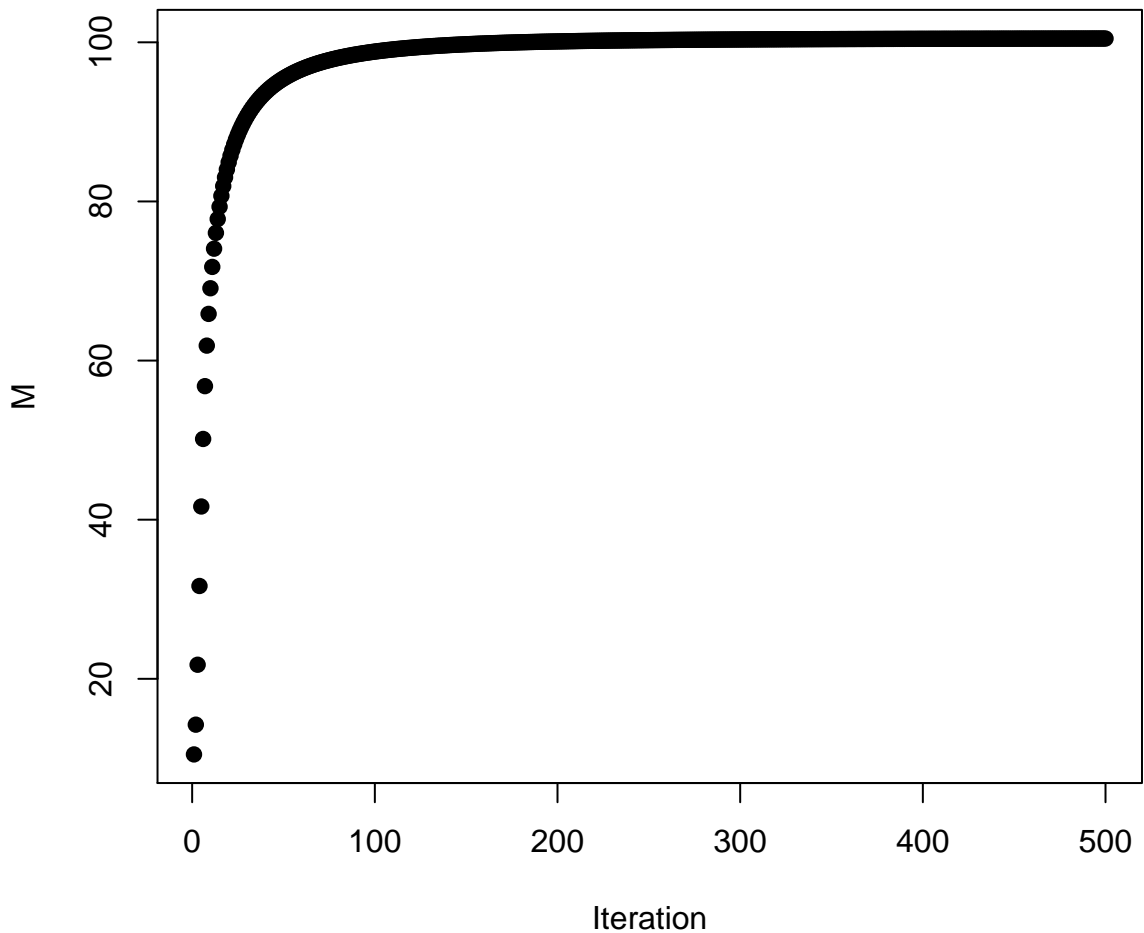

Supplement: Supplementary file 17 [file 1]

Shrinkage Factor (R): SIGMA[1,2]

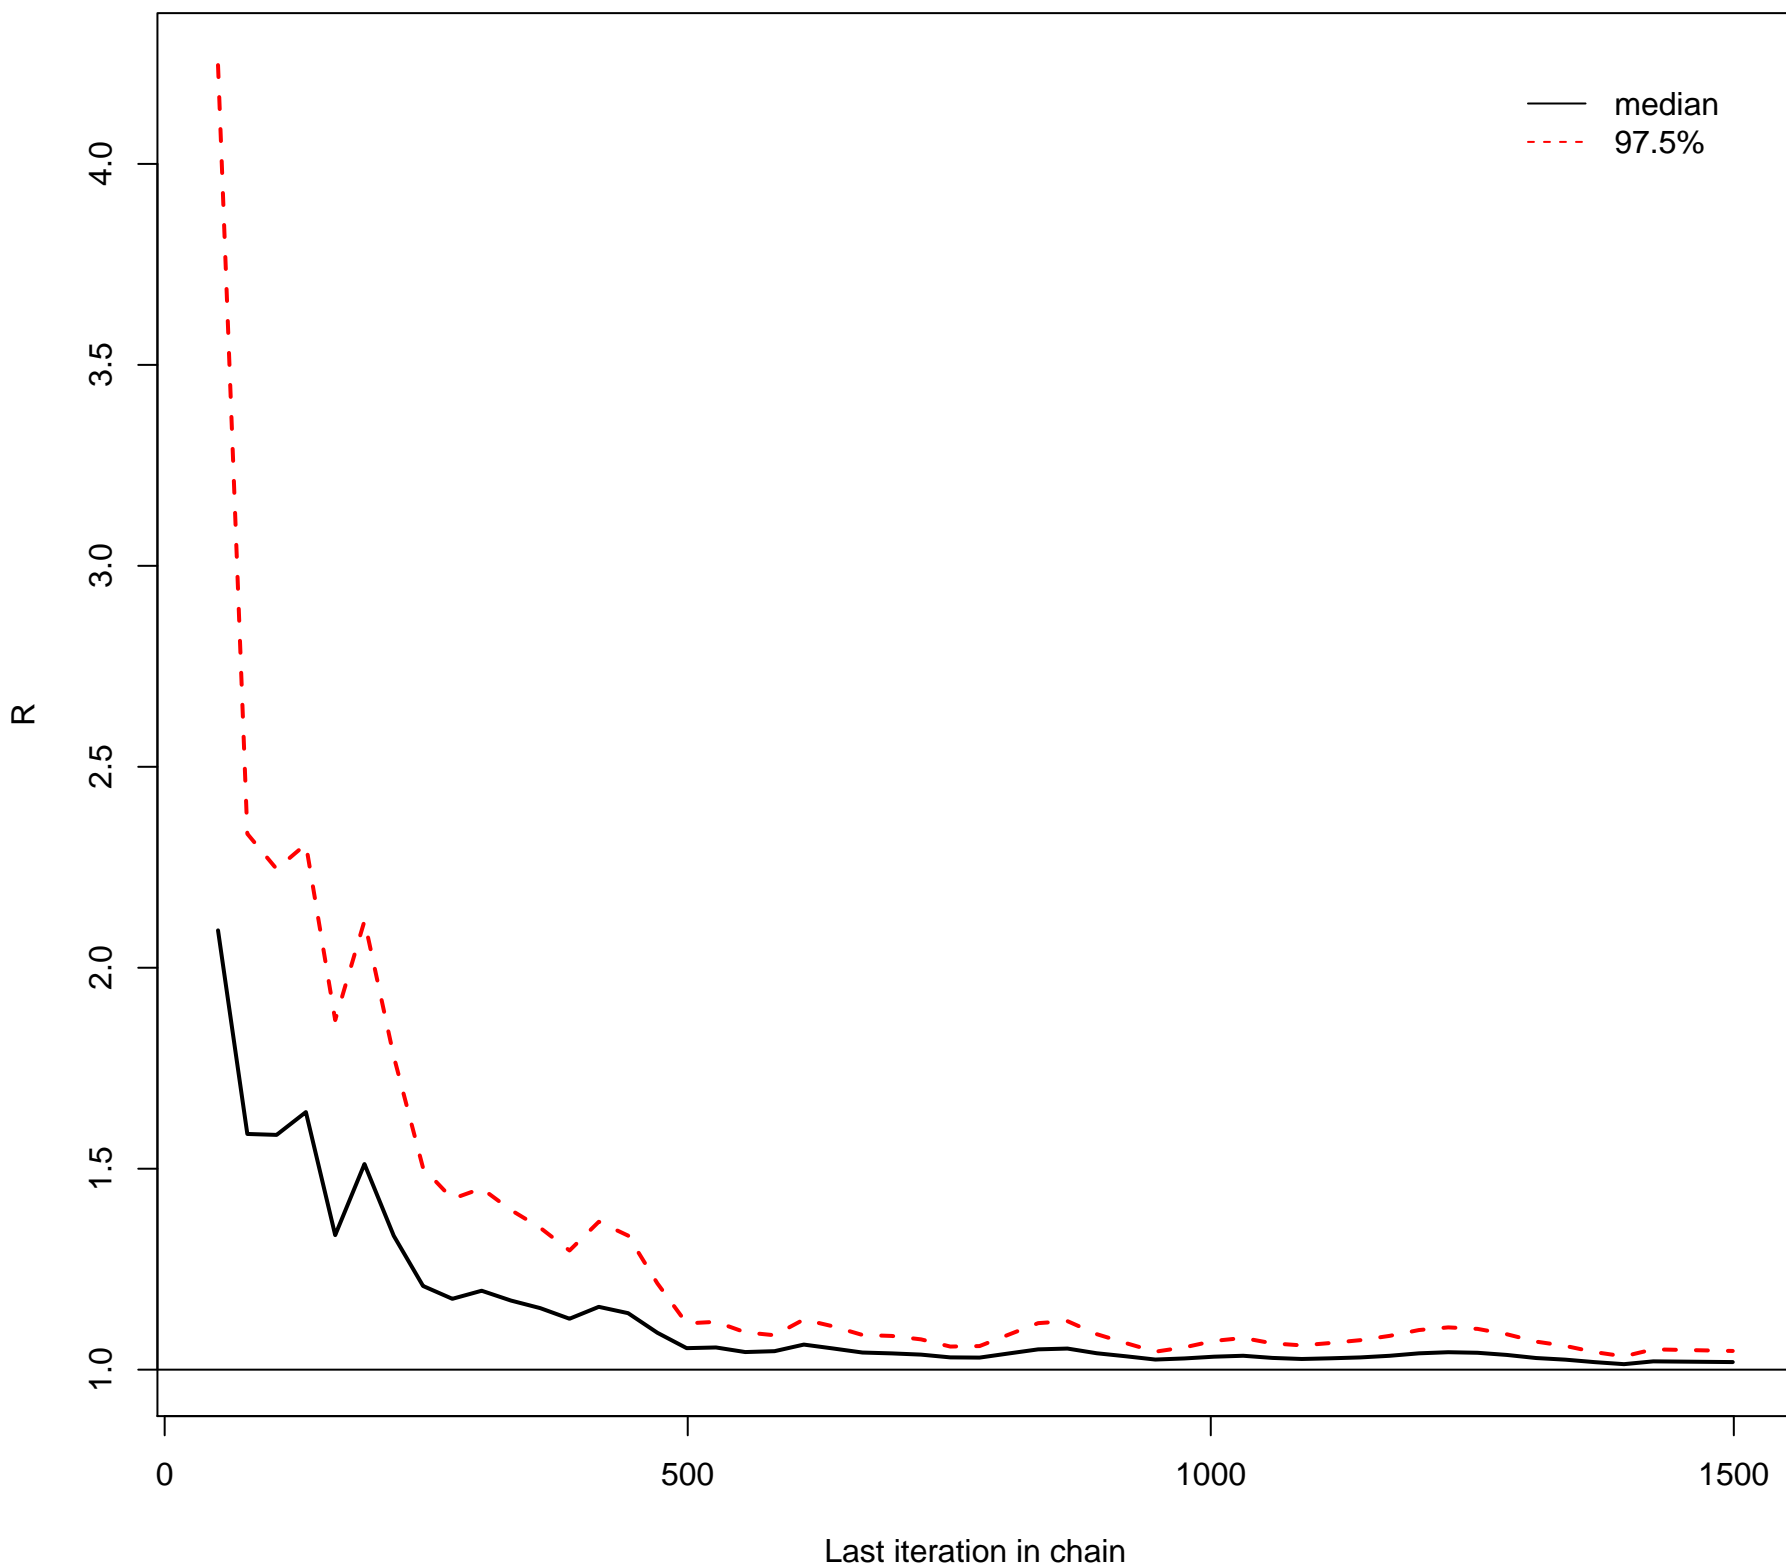

Supplement: Supplementary file 18 [file 1]

# Shrinkage Factor (R): SIGMA[2,2]

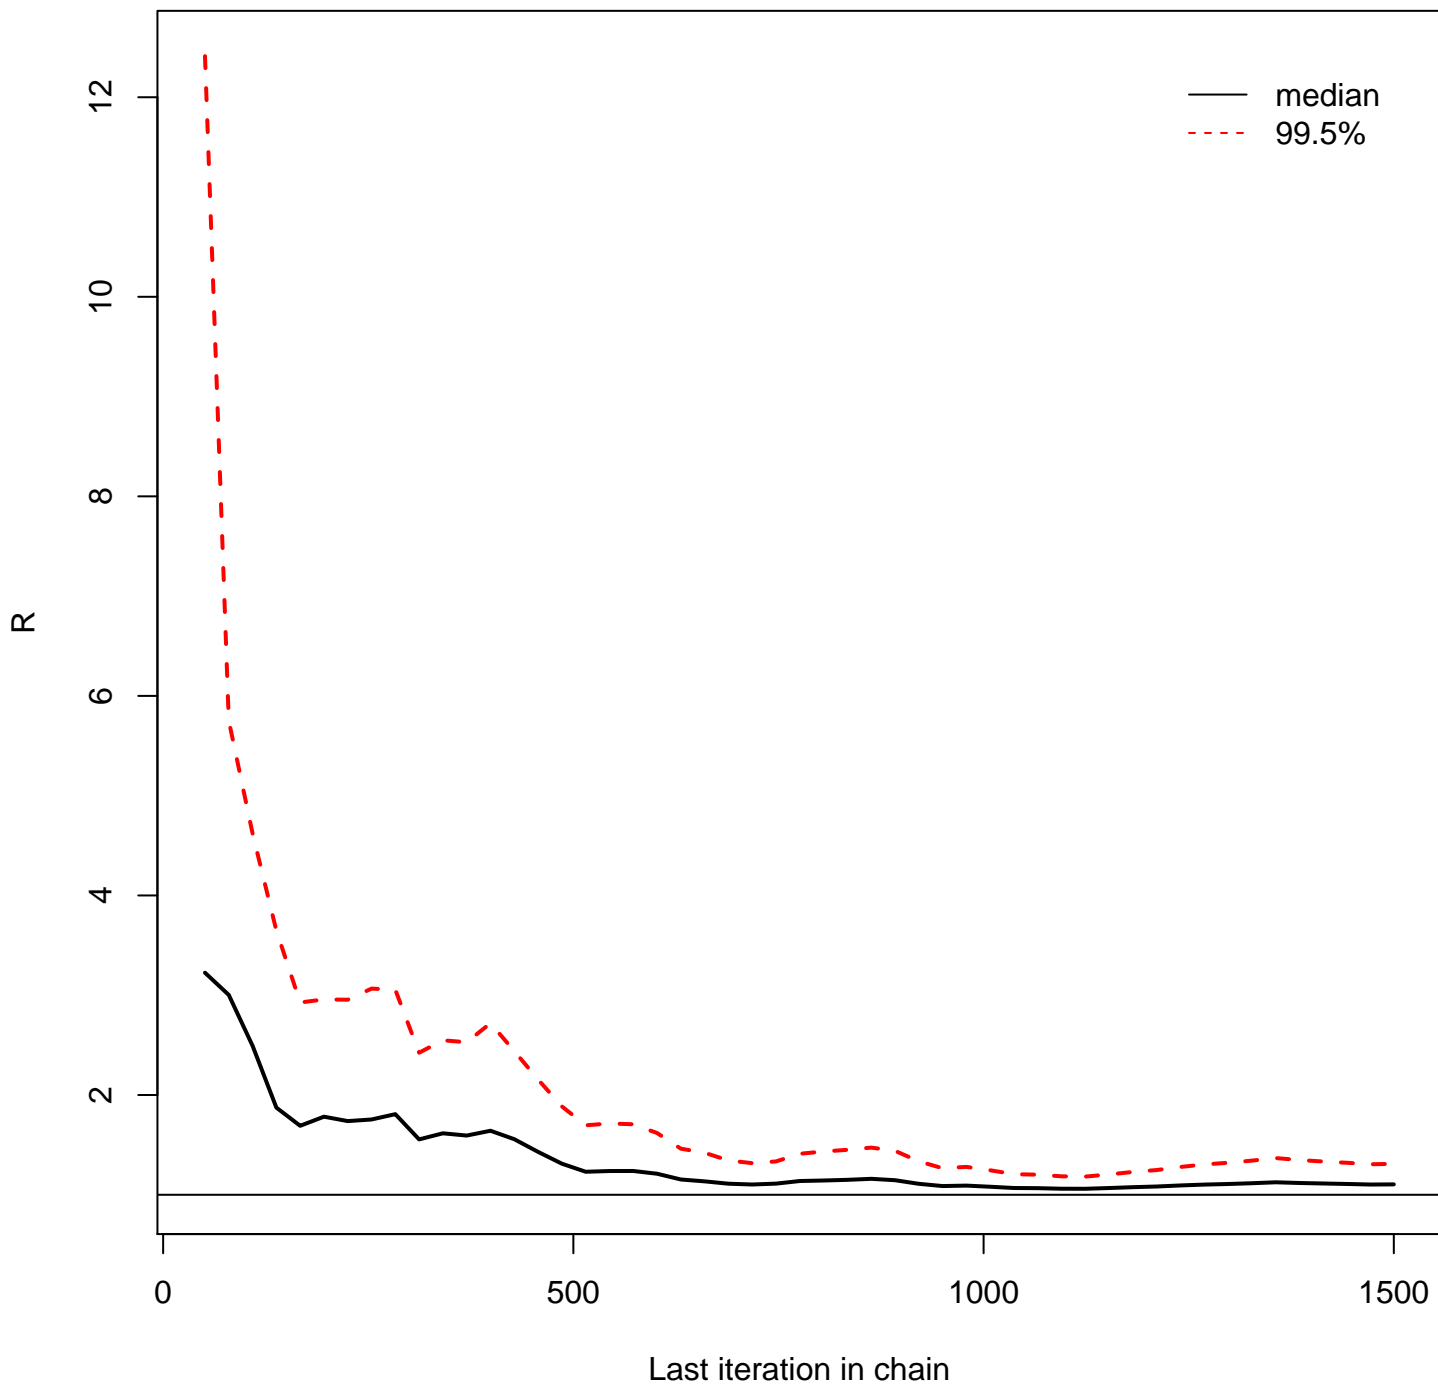

Supplement: Supplementary file 19 [file 1]
